## Long Title

*Staphylococcus aureus* infects osteoclasts and replicates intracellularly

## Short Title

*S. aureus* proliferates within osteoclasts

Jennifer L Krauss<sup>1¶</sup>; Philip M Roper<sup>1¶</sup>; Anna Ballard<sup>1</sup>; Chien-Cheng Shih<sup>2</sup>; James AJ Fitzpatrick<sup>2</sup>;  
James E Cassat<sup>3,4,5,6,7</sup>; Pei Ying Ng<sup>8</sup>; <sup>4</sup>Nathan J Pavlos<sup>8</sup>; Deborah J Veis<sup>1,9,10\*</sup>

<sup>1</sup>Division of Bone & Mineral Diseases, Musculoskeletal Research Center, Washington University School of Medicine, Saint Louis MO, USA

<sup>2</sup>Washington University Center for Cellular Imaging, Washington University School of Medicine, Saint Louis MO, USA

<sup>3</sup>Department of Pathology, Microbiology, and Immunology, Vanderbilt University Medical Center, Nashville TN, USA

<sup>4</sup>Department of Pediatrics, Division of Pediatric Infectious Diseases, Vanderbilt University Medical Center, Nashville, TN, USA

<sup>5</sup>Department of Biomedical Engineering, Vanderbilt University Medical Center, Nashville, TN, USA

<sup>6</sup>Vanderbilt Institute for Infection, Immunology and Inflammation (VI4), Vanderbilt University Medical Center, Nashville, TN, USA

<sup>7</sup>Vanderbilt Center for Bone Biology, Vanderbilt University Medical Center, Nashville, TN, USA

<sup>8</sup>School of Biomedical Sciences, University of Western Australia, Western Australia, Australia

<sup>9</sup>Department of Pathology and Immunology, Washington University School of Medicine, Saint Louis MO, USA

<sup>10</sup>Shriners Hospitals for Children, Saint Louis MO, USA

<sup>¶</sup>These authors contributed equally to this work as co-first authors.

\*Corresponding author, email: [dveis@wustl.edu](mailto:dveis@wustl.edu) (DJV).

## 39 Abstract

40 Osteomyelitis (OM), or inflammation of bone tissue, occurs most frequently as a result of bacterial  
41 infection and severely perturbs bone structure. The majority of OM is caused by *Staphylococcus*  
42 *aureus*, and even with proper treatment, OM has a high rate of recurrence and chronicity. While *S.*  
43 *aureus* has been shown to infect osteoblasts, persist intracellularly, and promote the release of pro-  
44 osteoclastogenic cytokines, it remains unclear whether osteoclasts (OCs) are also a target of  
45 intracellular infection. In this study, we examined the interaction between *S. aureus* and OCs,  
46 demonstrating internalization of GFP-labeled bacteria by confocal microscopy, both *in vitro* and *in*  
47 *vivo*. Utilizing an intracellular survival assay and flow cytometry during OC differentiation from bone  
48 marrow macrophages (BMMs), we found that the intracellular burden of *S. aureus* increases after  
49 initial infection in cells with at least 2 days of exposure to the osteoclastogenic cytokine receptor  
50 activator of nuclear factor kappa-B ligand (RANKL). Presence of dividing bacteria was confirmed via  
51 visualization by transmission electron microscopy. In contrast, undifferentiated BMMs, or those  
52 treated with interferon- $\gamma$  or IL-4, had fewer internal bacteria, or no change, respectively, at 18 hours  
53 post infection, compared to 1.5 hours post infection. To further explore the signals downstream of  
54 RANKL, we manipulated NFATc1 and alternative NF- $\kappa$ B, which controls NFATc1 and other factors  
55 affecting OC function, finding that intracellular bacterial growth correlates with NFATc1 levels in  
56 RANKL-treated cells. Confocal microscopy in mature OCs showed a range of intracellular infection  
57 that correlated inversely with *S. aureus* and phagolysosome colocalization. The ability of OCs to  
58 become infected, paired with their diminished bactericidal capacity compared to BMMs, could  
59 promote OM progression by allowing *S. aureus* to evade initial immune regulation and proliferate at  
60 the periphery of lesions where OCs and bone remodeling are most abundant.

## 62 Author Summary

63 The inflammation of bone tissue is called osteomyelitis, and most cases are caused by an  
64 infection with the bacterium *Staphylococcus aureus*. To date, the bone building cells, osteoblasts,  
65 have been implicated in the progression of these infections, but not much is known about how the  
66 bone resorbing cells, osteoclasts, participate. In this study, we show that *S. aureus* can infect  
67 osteoclasts and proliferate inside these cells, whereas macrophages, immune cells related to  
68 osteoclasts, destroy the bacteria. These findings elucidate a unique role for osteoclasts to harbor  
69 bacteria during infection, providing a possible mechanism by which bacteria could evade destruction  
70 by the immune system. Therapeutic interventions that target osteoclasts specifically might reduce the  
71 severity of OM or improve antibiotic responses.

## 73 Keywords

74 Bone, osteoclasts, osteomyelitis, *Staphylococcus aureus*, RANKL

## 76 Introduction

77 Although the name technically refers to the inflammation of the marrow cavity, the term  
78 osteomyelitis (OM) most frequently is used to indicate infection of the bone itself. At the center of  
79 infectious OM lesions, bone is frequently lost by necrosis, forming a devascularized segment of bone  
80 known as a sequestrum. Osteoclasts (OCs) are recruited to the site via inflammatory cytokine release

81 and expand the area of bone loss. New bone is formed on the periosteum in the body's attempt to  
82 isolate the infection, generating an involucrum. Thus, the normal balance between bone formation  
83 and resorption is disrupted in OM, leading to pathologic fractures and deformities [1]. Compared to  
84 other tissues, bone infections are especially damaging and intractable, with treatment often involving  
85 prolonged antibiotics paired with surgical debridement [2]. However, even with proper treatment, OM  
86 has a high recurrence rate, leading to a chronic debilitating condition [3, 4]. OM is predominantly  
87 divided into two broad categories: 1) acute hematogenous OM caused by bacteria seeding directly  
88 into bone from the circulation, and 2) secondary OM originating from a contiguous source like a soft  
89 tissue infection or orthopedic implant, or following open fracture [1, 5]. Acute hematogenous OM is  
90 most common in children, with 85% of cases occurring in children under 17 years of age, whereas  
91 secondary OM infections are more common in older adults, especially those undergoing orthopedic  
92 surgery [5, 6]. Regardless of the type of OM, most cases are caused by *Staphylococcus aureus* [6, 7].

93 Despite the clinical significance of OM infections, there remains a dearth of knowledge as to the  
94 mechanisms underlying the etiopathology of the disease. To this point, most of the basic science  
95 work on OM has focused on characterizing changes to the structure of the bone [8, 9, 10], elucidating  
96 bacterial survival strategies [11, 12], or examining the role of osteoblasts in promoting infection [11,  
97 13, 14, 15]. *S. aureus* has the ability to infect osteoblasts, persist intracellularly, and induce the  
98 release of osteoclastogenic and inflammatory cytokines, leading to OC recruitment and differentiation  
99 at the site of infection [9, 13, 14, 16]. Investigation into the role of OCs in OM has focused mainly on  
100 determining the effects of *S. aureus* infection on bone resorption, while neglecting to examine  
101 whether OCs could be the target of infection, as well. [17, 18, 19, 20].

102 OCs are differentiated from the myeloid lineage in a process that involves RANKL signaling to  
103 alternative NF- $\kappa$ B signaling through NIK and RelB, activating NFATc1 [21, 22, 23]. However, despite  
104 their shared lineage, OCs show a decreased release of inflammatory cytokines and nitric oxide when  
105 challenged with bacteria as compared to macrophages [19]. Macrophages attempt to destroy  
106 internalized *S. aureus* via phagolysosomal acidification [24], but *S. aureus* can also persist within  
107 macrophages through intraphagolysosomal replication and escape [25, 26]. Yet, the ability of OCs to  
108 control *S. aureus* infection is not known. In this study, we show that *S. aureus* is not only able to infect  
109 OCs, but also proliferates within them, avoiding lysosomal compartments. These results highlight  
110 osteoclasts' potential facilitation of *S. aureus* immune evasion, which could be an important  
111 mechanism in the propagation of OM infections, as well as explain the propensity for OM recurrence.  
112 This study illuminates a novel function of osteoclasts in OM as an intracellular reservoir allowing  
113 bacterial proliferation, in addition to their ability to modulate bone structure through perturbed  
114 remodeling.  
115

## 116 Results

### 117 *S. aureus* resides within osteoclasts *in vivo* and *in vitro*

118 Although previous studies have shown that *S. aureus* invasion of osteoblasts leads to RANKL  
119 expression and robust OC recruitment at sites of bone infection [13, 14], it remains unclear whether  
120 OCs are cellular targets for intracellular infection. To demonstrate the intracellular presence of *S.*  
121 *aureus* within OCs *in vivo*, we injected GFP expressing-*S. aureus* (USA300-lineage strain LAC)  
122 subcutaneously over the periosteum of calvaria in TRAP-tdTomato (herein referred as TRAP<sup>Red</sup>)  
123 reporter mice [27]. Prior to microbial challenge, RANKL was injected daily over the calvaria for 5 days  
124 to recruit OCs and their precursors to the subsequent site of infection. At 24 hours post-infection (hpi),  
125 calvaria were harvested and histological sections were examined by confocal microscopy to visualize  
126 bacteria residing within OCs, since both are fluorescently labeled. As shown in Figure 1A, GFP-  
127 expressing *S. aureus* can clearly be found localized within TRAP<sup>Red</sup> OCs. Murine OCs were also

generated on bone slices *in vitro*, then infected with GFP-labeled *S. aureus* and imaged 18 hours later. Again, bacteria were found within OCs (Fig 1B).

In order to demonstrate whether the observed intracellular bacteria were viable, we used a gentamicin-based protection assay. Murine bone marrow macrophages (BMMs) were differentiated with RANKL for up to 3 days (Fig 1C) and infected with *S. aureus* for 30 minutes at a multiplicity of infection (MOI) of 1:1, after which extracellular bacteria were killed by the addition of gentamicin for 1 hour. Infected cells were lysed following 16.5 hours of additional culture (at 18 hpi), and colony forming units (CFUs) enumerated. While exposure of BMMs to RANKL for 1 day had no effect on the number of bacteria recovered, 2 days of differentiation in RANKL (lineage-committed TRAP+ preosteoclasts [preOCs]) led to ~100-fold increased bacteria load, and 3 days of RANKL (fully differentiated OCs) caused a ~500-fold change, compared to no RANKL (undifferentiated BMMs) (Fig 1D). In order to preclude any confounding effects that may be specific to gentamicin treatment in our assay, we repeated the 18 hpi CFU assay during OC differentiation with lysostaphin as the bactericidal agent instead of gentamicin. We found the patterns of increased intracellular bacterial load in OCs at 18 hpi were the same in our lysostaphin protection assay as with our gentamicin protection assay (S1 Fig).

### ***S. aureus* proliferates within osteoclasts *in vitro***

BMMs have innate immune activity and have previously been shown to phagocytose and kill intracellular bacteria [24]. Using the gentamicin protection assay, we confirmed that our BMMs behave similarly, finding that the number of intracellular *S. aureus* at 18 hpi is ~10-fold lower than at 1.5 hpi, immediately after removal of extracellular bacteria by antibiotic treatment (Fig 2A, D0). In contrast, bacterial recovery from RANKL-treated cultures (D2 or D3) demonstrated a dramatic increase between 1.5 and 18 hpi, suggesting that *S. aureus* can proliferate within OCs. There was no difference in the ability of any of the cultures to internalize *S. aureus*, as the 1.5 hpi bacterial counts were similar across groups. In order to rule out potential differential effects of OCs grown on culture-treated plastic, we confirmed similar results in OCs grown and infected on bone chips *in vitro* (S2 Fig). Next, to establish whether these observations were merely an artifact of murine OCs, we infected primary human OCs generated from peripheral blood CD14<sup>+</sup> monocytes. Consistent with the data in the mouse system, human OCs significantly promote intracellular replication of *S. aureus* (Fig 2B).

Since the antimicrobial properties of myeloid cells are altered by cytokine exposure, we sought to determine whether RANKL was unique in its ability to promote intracellular bacterial growth. To address this question, we polarized BMMs for 2 days with IFN- $\gamma$ , towards an antimicrobial M1 phenotype, or with IL-4, towards an M2 phenotype expected to have reduced antimicrobial defense, and then compared these to RANKL-stimulated BMMs (i.e. preOC). In all cases, levels of bacteria were similar at 1.5 hpi, indicating consistent internalization (Fig 2C). IFN- $\gamma$  treatment led to higher levels of killing than observed in control PBS-treated BMMs, as expected for M1-polarized cells. In the IL-4 stimulated, M2-polarized cells, we found that *S. aureus* are present at the same levels 1.5 and 18 hpi, indicating persistence rather than intracellular killing or proliferation. Thus, RANKL initiates a distinct program that alters the antimicrobial profile of BMMs as they differentiate toward OCs.

To further explore the fate of bacteria after internalization, we again utilized GFP-labeled *S. aureus*, this time for flow cytometry. BMMs or preOCs grown in RANKL for 2 days were infected at an MOI of 1:1, extracellular bacteria killed with gentamicin as before, and then cells were fixed at 2 or 18 hpi. At this low MOI, a minority of cells bear detectable levels of GFP<sup>+</sup> bacteria at 2 hpi, and the level is similar between BMMs and preOCs (Fig 2D, 2E), as we observed in the bulk CFU assay (Fig 2A, 2C). By 18 hpi, the fraction of GFP<sup>+</sup> BMMs decreased similar to previous observations, although it did



not reach statistical significance. There was no statistically significant change in the percent of GFP+ D2 preOCs at 18 hpi, although there was higher variability between biological replicates. Very few bacteria were detected in the culture media at 12-18 hpi, suggesting it is unlikely that cell lysis and new infection of adjacent cells occurs at a high enough frequency to affect our readouts (S1 Table). We next plotted the mean fluorescence intensity (MFI) of the GFP+ populations in each culture (Fig 2F). There was no change in the BMMs with time, suggesting that the few cells that were unable to clear bacteria nevertheless restrained their growth. In contrast, the MFI of GFP+ preOCs increased ~4-fold between 2 and 18 hpi, indicating a greater number of bacteria per cell at the later timepoint. Further, the histogram (Fig 2D) shows a population of preOC at 18 hpi with a very high MFI (up 100-500-fold) compared to any other culture condition, suggesting that a subset of these cells allows rapid intracellular replication of *S. aureus*. Supporting our conclusion that the bacteria are expanding within RANKL-treated cells, transmission electron microscopy demonstrates dividing bacteria in mature OCs at 18 hpi (Fig 2G).

### **Proliferative capacity of *S. aureus* within osteoclasts is NFATc1-dependent in response to RANKL**

Having demonstrated that *S. aureus* proliferates robustly within differentiated OCs, we next wanted to determine whether deficiency of NFATc1, the master transcriptional regulator of OC formation, would modulate intracellular bacterial levels in response to RANKL. To this end, *Nfatc1<sup>fl/fl</sup>* mice were mated to an inducible *Mx1-cre* transgenic line and Poly I:C was used to conditionally delete *Nfatc1* one month prior to harvest of BMMs (Fig 3A). Consistent with the critical function of NFATc1 in driving OC differentiation (Fig 3B), we find that *S. aureus* was unable to replicate in NFATc1-deficient cells in response to RANKL stimulation (Fig 3C, D2 condition). In contrast, we found no difference in the microbial load between unstimulated Ctrl and NFATc1-deficient BMMs, a result consistent with the low basal expression of NFATc1 in the absence of RANKL (Fig 3A).

Because we found that RANKL-induced NFATc1 promotes intracellular replication of *S. aureus*, we evaluated whether forced expression of this molecule would further enhance microbial expansion. For this purpose, we cloned *Nfatc1* cDNA into the pMX retroviral vector and transduced Wt BMMs. Following blasticidin selection, transduced cells were cultured with M-CSF alone or under osteoclastogenic conditions and challenged with *S. aureus*. Using this gain-of-function approach, we demonstrate that ectopic expression of NFATc1, which accelerates OC differentiation, significantly increased microbial burden when compared to cells transduced with empty vector under osteoclastogenic conditions (Fig 3D). Surprisingly, overexpression of NFATc1 in BMMs, in the absence of RANKL signaling, failed to support replication, as differences in microbial load were comparable to empty vector control. Similarly, treatment with rosiglitazone, a peroxisome proliferator-activated receptor- $\gamma$  agonist that augments RANKL-induced NFATc1 levels when combined with RANKL (Fig 3E), led to a significant increase in intracellular microbial accumulation relative to untreated OCs (Fig 3F). However, in the absence of RANKL, NFATc1 expression was not induced and intracellular microbial counts were comparable between rosiglitazone treated and untreated BMMs (Fig 3F). Thus, using both genetic and pharmacological approaches, intracellular proliferation of *S. aureus* within OCs is NFATc1-dependent in response to RANKL stimulation.

### **Alternative NF- $\kappa$ B promotes intracellular expansion of *S. aureus***

Although our data demonstrate a clear role for NFATc1 in facilitating intracellular growth of *S. aureus* in OCs, we found that microbial burden was unaltered in NFATc1 overexpressing BMMs compared to empty vector controls, suggesting that other RANKL-induced signaling pathways are

also essential for the effect. Previously, our group has demonstrated that the alternative NF- $\kappa$ B signaling pathway is highly upregulated by RANKL stimulation and promotes OC formation [22, 23, 28]. In order to investigate the importance of alternative NF- $\kappa$ B signaling in promoting *S. aureus* intracellular expansion, we utilized cells deficient in the alternative NF- $\kappa$ B central upstream kinase NIK or the downstream transcription factor RelB. Loss of either NIK or RelB significantly decreases the ability of *S. aureus* to replicate intracellularly (Fig 4A, 4B).

NFATc1 levels are significantly reduced with RelB deficiency, and retroviral overexpression of NFATc1 can rescue deficient OC formation that results from the loss of RelB [23]. Therefore, we next determined whether ectopic expression of NFATc1 could restore the ability of *S. aureus* to replicate in RelB-deficient cells. Consistent with a rescue in differentiation and NFATc1 restored to empty vector WT levels (Fig 4C, 4D), we found that microbial burden was also restored to empty vector WT levels in RelB knockout cells overexpressing NFATc1 under osteoclastogenic conditions (Fig 4E). These data highlight the importance of alternative NF- $\kappa$ B and NFATc1 signaling in mediating intracellular *S. aureus* replication.

### ***S. aureus* within osteoclasts is not located exclusively in phagolysosomes**

Macrophage subsets that kill bacteria after engulfment traffic them to phagolysosomes, a digestive hybrid organelle formed upon fusion of phagosomes with lysosomes [24]. To determine whether OCs fail to sequester *S. aureus* in phagolysosomes, we generated OCs on glass, infected with GFP+ bacteria, and stained the cells with the acidotrophic dye LysoTracker red at 18 hpi. Similar to the wide range in fluorescence intensity of infected D2 preOCs demonstrated by flow cytometry (Fig 2D), the number of bacteria in each mature OC was also variable (Fig 5A). Interestingly, in cells with a low bacterial load (Fig 5A, box 1), there is a high degree of colocalization between the bacteria and phagolysosomes (Fig 5B, 5C). Comparatively, cells harboring very large clusters of bacteria (Fig 5A, boxes 2 and 3) have more bacteria that do not appear to reside in acidified phagolysosomal compartments (Fig 5B), although the degree varies. The colocalization of the fluorescent signal peaks from the green GFP+ bacteria with the red LysoTracker stained phagolysosomes is represented by the Pearson's colocalization correlation coefficients (Rr) generated from line scans taken within each cell (Fig 5C). The Pearson's coefficients are inversely correlated to the amount of bacteria present within each of the three cells, indicating less phagolysosomal localization with higher bacterial loads. Thus, *S. aureus* within OCs seems to avoid killing by evading or escaping mature phagolysosomal compartments and the ensuing intraluminal digestion.

### **Discussion**

OM is a common and debilitating infection, with associated osteolysis causing pain and pathologic fractures. To this point, most of the work examining OCs in the context of OM has focused on the stimulatory effect of *S. aureus* on OC activity. In contrast, we utilized a low multiplicity of infection (MOI) of 1 to 10 which may reveal host-pathogen interactions that are masked by much higher bacterial loads, as different *S. aureus* inocula have been shown to have differential effects on the immune response and infection progression [29]. Here, we have shown that OCs are a target of *S. aureus* infection, *in vivo* and *in vitro*, providing the bacteria a replicative niche. Unlike their progenitors, OCs are unable to confine internalized *S. aureus* to phagolysosomes, the likely cause of their failure to eliminate the bacteria. Thus, the direct interactions between OCs and *S. aureus* may play an important role in the progression of OM beyond bone loss, affecting the survival and proliferation of the pathogens.

268 The ability of *S. aureus* to proliferate after internalization was dependent on prior RANKL  
269 stimulation of the host cell for 2 days, the point at which cells become positive for TRAP and are  
270 considered to be committed to the OC lineage. Complete differentiation into multinucleated OCs,  
271 whether on plastic or bone, was associated with an even higher level of intracellular bacteria. The  
272 effect of RANKL was unique, as polarization of the BMMs toward M2 macrophages with IL-4, which  
273 causes reduced bacterial killing, did not allow intracellular replication. Since osteoclastogenesis  
274 depends on NFATc1, it is not surprising that this transcription factor was also required for the effect of  
275 RANKL on *S. aureus*. Interestingly, overexpression of NFATc1 alone, which is not sufficient to cause  
276 OC differentiation, did not promote bacterial proliferation without concomitant RANKL exposure. This  
277 suggests that additional signals from RANKL/RANK are required. The alternative NF- $\kappa$ B pathway is  
278 activated by RANKL and is upstream of NFATc1 and other factors important for OC function [23].  
279 Deficiency of NIK, the apex kinase, results in a more severe impairment in OC differentiation relative  
280 to genetic disruption of RelB, the key transcriptional subunit [23], and likewise NIK ablation blunted *S.*  
281 *aureus* proliferation greater than RelB deficiency. Furthermore, restoration of NFATc1 expression in  
282 the RelB-deficient background to Wt levels also normalized both OC differentiation and bacterial  
283 loads, suggesting that in this context, NFATc1 activation is the primary mediator of bacterial handling.  
284 These findings are especially interesting in light of findings from others that elucidate the importance  
285 of RANKL-signaling in driving osteoclast-mediated inflammatory bone resorption [30].

286 Using a low MOI, we observed cellular heterogeneity within our cultures in both the D2 preOCs as  
287 well as in mature OCs. By flow cytometry, we were able to identify the small percentage of cells that  
288 actually became infected with *S. aureus*, and then follow the cultures over time. Since the fraction of  
289 infected cells did not change between 1.5 and 18 hpi, the increase in fluorescence represents  
290 bacteria replicating within previously infected cells, and not replication in the media and infection of  
291 new cells. We also found that amongst this infected population there were a subset of cells that  
292 allowed the replication of bacteria to a much greater extent than other cells, as reflected by the “tail”  
293 of high MFI cells only at 18 hpi in D2 preOCs. In fact, this minority population of cells could be  
294 responsible for the more than 2 log<sub>10</sub> increase in bacteria represented in the MFI by flow cytometry  
295 and CFUs in the antibiotic protection assays. It is possible that differences in bacterial expansion  
296 within the preOCs at D2 are related to degree of differentiation, since these primary cell cultures are  
297 somewhat heterogeneous. However, a similar variability in bacterial load was seen by confocal  
298 microscopy in mature OCs.

299 As OCs are differentiated from BMMs, it is important to compare the consequences of bacterial  
300 internalization between the two cell types in order to understand how OCs fail where macrophages  
301 succeed. BMMs effectively destroy internalized bacteria via phagolysosome acidification. For *S.*  
302 *aureus* this is a process involving NLRP3 inflammasome activation and Caspase-1 cleavage that  
303 leads to NADPH oxidase 2 (NOX2) production of reactive oxygen species [24]. We discovered that  
304 most mature multinucleated OCs exhibited poor colocalization of *S. aureus* with phagolysosomes,  
305 and interestingly, the OCs with the highest intracellular bacterial loads had the lowest degree of *S.*  
306 *aureus* colocalization with phagolysosomes. Our initial ultrastructural investigation using transmission  
307 electron microscopy showed that dividing *S. aureus* can be found in membrane-bound compartments,  
308 but the bacterial load in the visualized cells was relatively low compared to most seen on confocal  
309 microscopy. Therefore, it is possible that bacteria replicate in the cytoplasm as well. Although in our  
310 experimental conditions lysis of OCs is uncommon before 18 hpi, it becomes frequent by 24 hpi.  
311 Future work will focus on tracing the intracellular fate of the bacteria within OCs over time, including  
312 defining the endosomal compartments involved, and whether they escape into the cytoplasm prior to  
313 cell death. Additional single cell approaches will be required to determine which host cell pathways  
314 determine the fate of intracellular *S. aureus*, and whether these are responsible for the observed  
315 differences between cells.

316 Ultimately, this work elucidates a new role for OCs in propagating infectious OM, at least in the  
317 context of *S. aureus*. It has previously been shown that osteoblasts release pro-osteoclastogenic  
318 cytokines, including RANKL, that recruit and activate OCs at the site of infection. While others have

shown that *S. aureus* and its cellular components can promote osteoclastogenesis, OC activity, and pro-inflammatory cytokine release [17, 20, 31], this investigation focused on determining the infectability of OCs. We found that it is possible for OCs to become infected and provide a replicative niche for *S. aureus* to proliferate and evade immune destruction, and that this whole process is dependent on RANKL signaling. Although the influence of *S. aureus* on OC activity and cytokine production is undoubtedly important for the progression of OM lesions, we have extended the potential role for these cells to include bacterial expansion. If *S. aureus* promotes OC recruitment and formation and OCs can harbor bacteria from destruction, then these conditions can feed forward in a positive feedback loop. Thus, therapies aimed at modulating the ability of OCs to shelter bacteria might provide increased efficacy in curing these difficult-to-treat infections.

## Materials and Methods

### Reagents

Trypticase soy broth was procured from Fisher Scientific (Hampton, NH, USA). Fetal bovine serum and gentamicin (15750060) were purchased from Gibco-BRL (Grand Island, NY, USA).  $\alpha$ -MEM, anti- $\alpha$ -actin (A2228) antibody, rosiglitazone, Polyinosinic-polycytidylic acid (Poly I:C), and lysostaphin (L7386) were all purchased from Sigma-Aldrich (St. Louis, MO, USA). Macrophage-colony stimulating factor (M-CSF), in the form of CMG 14-12 supernatant, and glutathione-S-transferase RANKL (GST-RANKL) were prepared as previously described [21]. Human M-CSF and Ficoll histopaque were purchased from Invitrogen (Carlsbad, CA, USA). Human CD14 magnetic beads were obtained from Miltenyi Biotec (Auburn, CA, USA). Anti-NFATc1 (7AG) antibody was obtained from Santa Cruz Biotechnology (Dallas, TX, USA) and anti-histone H3 (96C10) from Cell Signaling Technology (Beverly, MA, USA). Murine recombinant IL-4 and IFN- $\gamma$  was purchased from Peprotech (Rocky Hill, NJ, USA).

### Mice

C57BL/6 male and female mice (8-10-week old) were purchased from The Jackson Laboratory (Bar Harbor, ME, USA). *Relb*<sup>-/-</sup> and *Nik*<sup>-/-</sup> mice and their littermate controls were generated by heterozygotic mating of *Relb*<sup>+/-</sup> and *Nik*<sup>+/-</sup>, respectively, in a specific pathogen-free facility as previously described [22, 28]. TRAP promoter-tdTomato (TRAP<sup>Red</sup>) transgenic mice were generated by Dr. Ishii (Immunology Frontier Research Center, Osaka University, Osaka, Japan [27]), provided by Dr. J. Lorenzo, and maintained by heterozygotic mating in our specific pathogen-free facility. Conditional knockout *Nfatc1* (*Nfatc1* cKO) mice were provided by Julia Charles (Harvard Medical School, Boston, MA) and generated by crossing *Nfatc1* fl/fl mice with a transgenic line expressing the Cre recombinase from a type I interferon inducible promoter (*Mx1-Cre*) as previously described [32]. Activation of *Mx1-Cre* was achieved by intraperitoneal injection of 0.25 ml of 1 mg/ml poly I:C in PBS every other day. Three rounds of injections were given, followed by a three week waiting period to ensure optimal *Nfatc1* deletion. Littermates lacking the *Mx1-Cre* transgene were treated identically with poly I:C and served as NFATc1-sufficient (*Nfatc1* fl/fl) controls. For all experiments employing genetically modified mice, results were compared to cells from sex/age-matched littermate controls.

### Osteoclast culture



To generate osteoclasts (OCs) from enriched bone marrow macrophages (BMMs), bone marrow was harvested from the long bones of 10-12 week old mice and cells were cultured in  $\alpha$ -MEM plus 10% FBS and a 1:10 dilution of CMG 14-12 cell supernatant (containing equivalent of 100 ng/ml of M-CSF) for 4 days to expand BMMs. Non-adherent cells were removed by several washes in PBS and adherent BMMs were detached with trypsin-EDTA, seeded into tissue-cultured treated plates and cultured in  $\alpha$ -MEM plus 10% FBS containing a 1:50 dilution of CMG 14-12 cell supernatant (containing equivalent of 20 ng/ml of M-CSF) and GST-RANKL (60ng/mL) with media changes every day for indicated time periods.

For human osteoclastogenesis, peripheral blood mononuclear cells were obtained by density gradient centrifugation with Ficoll histopaque. Monocytes were isolated using anti-CD14 magnetic beads according to manufacturer directions. Human CD14+ cells were seeded into 6 well plates at a seeding density of  $1 \times 10^6$  cells per well. Monocyte-derived osteoclasts were generated by culturing CD14+ cells for 6 days in  $\alpha$ -MEM plus 10% FBS containing 20 ng/ml of human M-CSF and GST-RANKL. Media was changed and cytokines were replenished every other day.

### Bacterial strains and growth conditions

All experiments were conducted with derivatives of *Staphylococcus aureus* USA300 clinical isolate LAC [33]. Bacterial strains were grown in trypticase soy broth (TSB) overnight at 37°C with shaking at 225 rpm, subcultured at a dilution of 1:100, grown to the mid-exponential phase ( $OD_{600} = 1.0$ ) and centrifuged at 3000 rpm for 10 minutes. The pellets were washed and re-suspended with PBS to the desired concentration. To create a stable GFP+ strain of *S. aureus*, the region containing the *sarA* promoter driving sfGFP was first amplified out of pCM11 [34] using primers 5'-GTTGTTTCTAGACTGATATTTTGGACTAAACCAAATG-3' and 5'-GTTGTTGAGCTCTTAGTGTTGGTGGTG-3' (restriction sites underlined). The resulting PCR amplification product was then ligated into the XbaI and SacI site of pJC1111 to create pNP1. pNP1 was then chromosomally integrated into the SaPI1 site of *S. aureus* as previously described [35]. The region encompassing the chromosomal SaPI1 integration was then transduced into *S. aureus* strain LAC (AH1263) [33] using phi80a. Integration of *PsarA\_sfGFP* at the SaPI1 site was confirmed using primers JCO717 and 719 [35].

### Antibiotic protection assays

Infection of BMMs and OCs by *S. aureus* was quantified by determining the number of colony forming units (CFU) recovered from antibiotic treatment using a gentamicin protection assay as previously described [25, 26, 36]. Briefly, cells were seeded at  $5 \times 10^5$ /well in 6-well plates and cultured in  $\alpha$ MEM plus 10% FBS containing a 1:50 dilution of CMG 14-12 cell supernatant (containing equivalent of 20 ng/ml of M-CSF) in the absence or presence of GST-RANKL for the designated time of osteoclastic differentiation, as described above. To determine the level of intracellular survival, the cells were infected for 30 minutes at an MOI of 1:1 (final dose of  $5 \times 10^5$ /well) at 37°C in 5% CO<sub>2</sub>, washed twice in PBS and cultured in media ( $\alpha$ -MEM plus M-CSF +/- RANKL) containing antibiotic (gentamicin at final concentration of 0.3 mg/ml or lysostaphin at final concentration of 20ug/mL) for 1 hour to kill extracellular bacteria. Cells were washed twice in PBS to remove antibiotic and lysed in sterile, ice-cold ultra-pure H<sub>2</sub>O for the 1.5 hour time point (1.5 hpi). For the 18 hour time point (18 hpi), culture media ( $\alpha$ -MEM plus M-CSF +/- RANKL) was replaced after PBS washes and infection was continued to 18 hours post-infection prior to hypotonic lysis as described above. Lysates were 10-fold serially diluted, plated on TSB solidified with 1.5% agar (TSA), incubated overnight at 37°C and CFU

406 enumerated. Controls for antibiotic killing of *S. aureus* were included in all experiments by plating  
407 supernatant on TSA and inspecting for colonies after overnight incubation at 37°C.  
408

## 409 Flow cytometric assays

410 For flow cytometry, cells were seeded at  $5 \times 10^5$ /well in 6-well tissue culture treated plates, as  
411 described above. Cells were challenged with GFP-expressing *S. aureus* at an MOI of 1:1 for 30  
412 minutes, and the extracellular bacteria was killed by the addition of gentamicin to the media for one  
413 hour. Cells were washed twice in PBS to remove antibiotic, and then media was replenished. The  
414 cells were then harvested at 2 hours (2 hpi) or 18 hours (18 hpi). Cells were detached with trypsin-  
415 EDTA, washed twice in PBS to remove non-adherent bacteria and extracellular fluorescence  
416 (reflecting attached but un-internalized bacteria) was quenched with 0.2% trypan blue as previously  
417 described [36] Cells were washed twice in PBS, fixed in 90% methanol for 30 minutes at 4°C and  
418 analyzed via flow cytometry (% FITC-positive cells and mean fluorescence intensity of FITC-positive  
419 population), using a BD LSR-II flow cytometer in 2mM EDTA, 2% FBS PBS. The data was analyzed  
420 using Flow Jo v 10.5.3.  
421

## 422 Confocal microscopy

423 Laser scanning confocal microscopy of mouse calvaria was performed to assess microbial uptake  
424 by osteoclasts *in vivo*. Prior to infection, RANKL (2 mg/kg body weight) was injected over the  
425 periosteum of calvaria of TRAP<sup>Red</sup> reporter mice once per day for 5 days. Subsequently,  $10^7$  GFP-  
426 expressing *S. aureus* were suspended in 100  $\mu$ l PBS and subcutaneously injected over the  
427 periosteum of the calvaria. At 24 hours post-infection, calvariae were harvested, fixed overnight in 4%  
428 paraformaldehyde at room temperature and washed six times with PBS in 15 minute intervals.  
429 Calvariae were next decalcified in 14% free acid EDTA for 3 days under continuous agitation,  
430 infiltrated in 30% sucrose overnight at 4°C followed by embedding in OCT media and cut to 10  $\mu$ m  
431 thick sections in a coronal orientation. Tissue sections were then mounted in Prolong Gold Antifade  
432 with DAPI and cured for 48 hours. For imaging of *in vivo* bacterial uptake, optical sectioning was  
433 performed by using Nikon A1RSi confocal microscope (Nikon Instruments Inc., NY, USA). Images  
434 were collected using an oil immersion 100x objective lens (CFI Plan Apo Lambda 100X Oil, Nikon  
435 Instruments Inc.) with 0.5  $\mu$ m z-steps. For each mouse, 15-20 optical sections were captured in 8-10  
436 different regions of interest from five separate tissue sections. Lasers at 405, 488, 561 nm were used  
437 to excite fluorescence from DAPI, GFP, and tdTomato reporter probes. Line-averaging and sequential  
438 scanning were employed to increase the signal-to-noise ratio and minimize spectral bleed-through,  
439 resulting in a frame acquisition time of 16 sec/frame. Background subtraction was carefully utilized to  
440 reduce the contribution of tissue autofluorescence. Images were processed in Nikon NIS-Elements  
441 (Nikon Instruments Inc.) and Fiji [37].

442 Murine bone marrow macrophage (BMM)-derived OCs differentiated on glass coverslips or  
443 devitalized bovine bone discs were incubated with GFP-expressing *S. aureus* (MOI=10) followed by  
444 gentamycin, as above, and cultured for a total of 18 hrs. To monitor for bacterial incorporation into  
445 phagolysosomes OCs were further incubated with the acidotrophic probe Lysotracker Red<sup>®</sup> DND-99  
446 (100 nm, Invitrogen) for 30 min prior to fixation. Cells were fixed in 4% paraformaldehyde (PFA) in  
447 PBS for 15 min at room temperature (RT), permeabilized with 0.1% Triton X-100 and stained with  
448 Alexa Fluor 647- conjugated phalloidin (1:500) and Hoechst 33258 dye (1:10,000) (Invitrogen) to  
449 visualize F-actin and nuclei, respectively. Samples were then mounted in ProLong<sup>®</sup> Gold Antifade  
450 (Thermo Fisher Scientific Co.) and imaged using a Nikon A1RSi confocal microscope, equipped with  
451 a 10X (dry) lens and 60X (oil immersion) lens (Nikon Instruments Inc., NY, USA). Images were  
452 collected using the Nikon NIS-C Elements software. Cross-correlation analysis (Pearson's, Rr) of

453 colocalization between bacteria and phagolysosomes was performed using online ImageJ macros  
454 (NIH).  
455

## 456 Immunoblotting

457 Cells were washed twice on ice with cold PBS and lysed in RIPA buffer (20 mM Tris, pH 7.5, 150  
458 mM NaCl, 1 mM EDTA, 1 mM EGTA, 1% Triton X-100, 2.5 mM sodium pyrophosphate, 1mM  $\beta$ -  
459 glycerophosphate, 1 mM Na<sub>3</sub>VO<sub>4</sub>, 1 mM NaF) containing Halt protease cocktail inhibitor (Thermo  
460 Scientific, Rockford, IL, USA). Following ten minutes incubation on ice, lysates were centrifuged at  
461 16,000 x g to pellet cellular debris and protein concentration was determined by BCA quantification  
462 assay (Bio-Rad, Hercules, CA, USA). For each sample, thirty micrograms of total lysate was resolved  
463 by SDS-PAGE electrophoresis and semi-dry transferred to a PVDF membrane. Membranes were  
464 blocked for 1 hour in 5% milk in TBS containing 0.1% tween, probed with respective primary  
465 antibodies overnight at 4 °C with continuous agitation followed by 1 hour incubation at room  
466 temperature with secondary HRP-conjugated antibodies. Proteins were detected using WesternBright  
467 Quantum HRP substrate (Advansta, Menlo Park, CA, USA) and visualized with Genesnap using the  
468 Syngene Imaging System (Synoptics, Frederick, MD, USA).  
469

## 470 Retroviral transduction

471 NFATc1-pMX construct was transiently transfected into Plat-E packaging cells by calcium  
472 phosphate precipitation method as previously described [23, 38]. Viral supernatant was harvested 48  
473 hours post-transfection and used to infect BMMs for 48 hours in the presence of M-CSF equivalent  
474 (20 ng/mL) and 4  $\mu$ g/mL polybrene, followed by selection in blasticidin for 3 days before culture with  
475 20 ng/mL M-CSF equivalent and GST-RANKL (30 ng/mL).  
476

## 477 Statistical Analysis

478 All data represented as the mean with standard deviation. Comparisons between groups of the  
479 CFUs from human OCs (Fig 2B) were analyzed by Student's t-test. Comparisons between groups of  
480 CFUs from 18hpi OCs from different days of RANKL treatment (Fig 1D) or NFATc1 overexpression  
481 (Fig 4E) were analyzed by one-way ANOVA with Tukey's multiple comparisons post-hoc test  
482 (GraphPad InStat). All other data analyzed by two-way ANOVA with Tukey's multiple comparisons  
483 post-hoc test, and  $p < 0.05$  was taken as significant.  
484

## 485 Ethics Statement

486 All animal procedures were approved by Washington University Institutional Animal Care and Use  
487 Committees (IACUC Protocol Number 20170025), in compliance with the established federal and  
488 state policies outlined in the Animal Welfare Act (AWA) and enforced by the United States  
489 Department of Agriculture (USDA), Animal and Plant Health Inspection Service (APHIS), USDA  
490 Animal Care.  
491

## 492 Acknowledgments

493 This work was supported by National Institutes of Health grants R21 AR073507 and R01  
494 AR070030 (to DJV), and by the Shriners' Hospitals for Children grant 85117 (to DJV). JEC is  
495 supported by National Institute of Allergy and Infectious Diseases grants 1R01AI132560 and  
496 5K08AI113107 and a Career Award for Medical Scientists from the Burroughs Wellcome Fund. NP is  
497 supported by NHMRC APP1143921. Histology was supported by the Washington University  
498 Resource Cores for Musculoskeletal Research (P30 AR074992). Confocal microscopy and data  
499 analysis were performed in part through the use of Washington University Center for Cellular Imaging  
500 (WUCCI) which is supported by Washington University School of Medicine, The Children's Discovery  
501 Institute of Washington University and St. Louis Children's Hospital (CDI-CORE-2015-505), the  
502 Foundation for Barnes-Jewish Hospital (3770) and the National Institute for Arthritis and  
503 Musculoskeletal Diseases (P30AR057235). We thank Linda Cox, Emily Goering, and Crystal Idleburg  
504 for technical support and laboratory contributions.  
505

## 506 References

- 507 1. Lew DP, Waldvogel FA. Osteomyelitis. *Lancet*. 2004; 364(9431): 369-379.
- 508 2. Calhoun JH, Manring MM, Shirliff M. Osteomyelitis of the long bones. *Semin Plast Surg*. 2009;  
509 23(2): 59-72.
- 510 3. Wright JA, Nair SP. Interaction of *staphylococci* with bone. *Int J Med Microbiol*. 2010; 300(2-3):  
511 193-204.
- 512 4. Funk SS, Copley LAB. Acute hematogenous osteomyelitis in children: pathogenesis, diagnosis,  
513 and treatment. *Orthop Clin North Am*. 2017; 48(2): 199-208.
- 514 5. Radcliffe G. Osteomyelitis: a historical and basic sciences review. *Orthop Trauma*. 2015, 29(4):  
515 243-252.
- 516 6. Guo G, Wang J, You Y, Tan J, Shen H. Distribution characteristics of *Staphylococcus* spp. In  
517 different phases of periprosthetic joint infection: A review. 2017; 13(6): 2599-2608.
- 518 7. Goergens ED, McEvoy A, Watson M, Barrett IR. Acute osteomyelitis and septic arthritis in  
519 children. *J Paediatr Child Health*. 2005; 41(1-2): 59-62.
- 520 8. Horst SA, Hoerr V, Beineke A, Kreis C, Tuscherr L, Kalinka J, et al. A novel mouse model of  
521 *staphylococcus aureus* chronic osteomyelitis that closely mimics the human infection: an  
522 integrated view of disease pathogenesis. *Am J Pathol*. 2012; 181(4): 1206-1214.



- 523 9. Lio P, Paoletti N, Moni MA, Atwell K, Merelli E, Viceconti M. Modeling osteomyelitis. BMC  
524 Bioinformatics. 2012; 13(Supple 14): S12.
- 525 10. Cassat JE, Hammer ND, Campbell JP, Benson MA, Perrien DS, Mrak LN, et al. A secreted  
526 bacterial protease tailors the *Staphylococcus aureus* virulence repertoire to modulate bone  
527 remodeling during osteomyelitis. Cell Host Microbe. 2013; 13(6): 759-772.
- 528 11. Tuchscher L, Medina E, Hussain M, Volker W, Heitmann V, Niemann S, et al. *Staphylococcus*  
529 *aureus* phenotype switching: an effective bacterial strategy to escape host immune response  
530 and establish a chronic infection. 2011; 3(3): 129-141.
- 531 12. Wilde AD, Snyder DJ, Putnam NE, Valentino MD, Hammer ND, Lonergan ZR, et al. Bacterial  
532 hypoxic responses revealed as critical determinants of the host-pathogen outcome by TnSeq  
533 analysis of *Staphylococcus aureus* invasive infection. PLoS Pathog. 2015; 11(12): e1005341.
- 534 13. Claro T, Widaa A, O'Seaghdha M, Miajlovic H, Foster TJ, O'Brien FJ, et al. *Staphylococcus*  
535 *aureus* protein A binds to osteoblasts and triggers signals that weaken bone in osteomyelitis.  
536 PLoS One. 2011; 6(4): e18748.
- 537 14. Widaa A, Claro T, Foster TJ, O'Brien FJ, Kerrigan SW. *Staphylococcus aureus* protein A plays  
538 a critical role in mediating bone destruction and bone loss in osteomyelitis. PLoS One. 2012;  
539 7(7): e40586.
- 540 15. Kavanagh N, O'Brien FJ, Kerrigan SW. *Staphylococcus aureus* protein A causes osteoblasts to  
541 hyper-mineralize in a 3D extra-cellular matrix environment. PLoS One. 2018; 13(6): e0198837.
- 542 16. Garzoni C, Kelley WL. *Staphylococcus aureus*: new evidence for intracellular persistence.  
543 Trends Microbiol. 2009; 17(5): 59-65.
- 544 17. Trouillet-Assant S, Gallet M, Nauroy P, Rasigade JP, Flammier S, Parroche P, et al. Dual impact  
545 of live *Staphylococcus aureus* on the osteoclast lineage, leading to increased bone resorption.  
546 J Infect Dis. 2015; 211(4): 571-581.

- 547 18. Mendoza Bertelli A, Delpino MV, Lattar S, Giai C, Llana MN, Sanjuan N, et al. *Staphylococcus*  
548 *aureus* protein A enhances osteoclastogenesis via TNFR1 and EGFR signaling. *Biochim*  
549 *Biophys Acta*. 2016; 1862(10): 1975-1983.
- 550 19. Wiggers EC, Johnson W, Tucci M, Benghuzzi H. Biochemical and morphological changes  
551 associated with macrophages and osteoclasts when challenged with infection. *Biomed Sci*  
552 *Instrum*. 2011; 47: 183-188.
- 553 20. Putnam NE, Fulbright LE, Curry JM, Ford CA, Petronglo JR, Hendrix AS, et al. MyD88 and IL-  
554 1R signaling drive antibacterial immunity and osteoclast-driven bone loss during *Staphylococcus*  
555 *aureus* osteomyelitis. *PLoS Pathog*. 2019; 15(4): e1007744.
- 556 21. Novack DV, Yin L, Hagen-Stapleton A, Schreiber RD, Goeddel DV, Ross FP, et al. The I $\kappa$ B  
557 function of NF- $\kappa$ B2 p100 controls stimulated osteoclastogenesis. *J Exp Med*. 2003; 198(5): 771-  
558 781.
- 559 22. Vaira S, Johnson T, Hirbe AC, Alhawagri M, Anwisyte I, Sammut B, et al. RelB is the NF- $\kappa$ B  
560 subunit downstream of NIK responsible for osteoclast differentiation. *Proc Natl Acad Sci U S A*.  
561 2008; 105(10): 3897-3902.
- 562 23. Zeng R, Faccio R, Novack DV. Alternative NF- $\kappa$ B regulates RANKL-induced osteoclast  
563 differentiation and mitochondrial biogenesis via independent mechanisms. *J Bone Miner Res*.  
564 2015; 30(12): 2287-2299.
- 565 24. Sokolovska A, Becker CE, Ip WK, Rathinam VA, Brudner M, Paquette N, et al. Activation of  
566 caspase-1 by the NLRP3 inflammasome regulates the NADPH oxidase NOX2 to control  
567 phagosome function. *Nat Immunol*. 2013; 14(6): 543-553.
- 568 25. Flannagan RS, Heit B, Heinrichs DE. Intracellular replication of *Staphylococcus aureus* in mature  
569 phagolysosomes in macrophages precedes host cell death, and bacterial escape and  
570 dissemination. *Cell Microbiol*. 2016; 18(4): 514-535.

- 571 26. Flannagan RS, Kuiack RC, McGavin MJ, Heinrichs DE. *Staphylococcus aureus* uses the  
572 GraXRS regulatory system to sense and adapt to the acidified phagolysosome in macrophages.  
573 MBio. 2018; 9(4): pii: e01143-18.
- 574 27. Kikuta J, Wada Y, Kowada T, Wang Z, Sun-Wada GH, Nishiyama I, et al. Dynamic visualization  
575 of RANKL and Th17-mediated osteoclast function. J Clin Invest. 2013; 123(2): 866-873.
- 576 28. Yang C, McCoy K, Davis JL, Schmidt-Supprian M, Sasaki Y, Faccio R, et al. NIK stabilization in  
577 osteoclasts results in osteoporosis and enhanced inflammatory osteolysis. PLoS One. 2010;  
578 5(11): e15383.
- 579 29. Vidlak D, Kielian T. Infectious dose dictates the host response during *Staphylococcus aureus*  
580 orthopedic-implant biofilm infection. Infect Immun. 2016; 84(7): 1957-1965.
- 581 30. Park-Min KH, Lim E, Lee MJ, Park SH, Giannopoulou E, Yarilina A, et al. Inhibition of  
582 osteoclastogenesis and inflammatory bone resorption by targeting BET proteins and epigenetic  
583 regulation. Nat Commun. 2015; 5: 5418.
- 584 31. Cao F, Zhou W, Liu G, Xia T, Liu M, Mi B, et al. *Staphylococcus aureus* peptidoglycan promotes  
585 osteoclastogenesis via TLR2-mediated activation of the NF- $\kappa$ B/NFATc1 signaling pathway. Am  
586 J Transl Res. 2017; 9(11): 5022-5030.
- 587 32. Aliprantis AO, Ueki Y, Sulyanto R, Park A, Sigrist KS, Sharma SM, et al. NFATc1 in mice  
588 represses osteoprotegerin during osteoclastogenesis and dissociates systemic osteopenia from  
589 inflammation in cherubism. J Clin Invest. 2008; 118(11): 3775-3789.
- 590 33. Boles BR, Thoendel M, Roth AJ, Horswill AR. Identification of genes involved in polysaccharide-  
591 independent *Staphylococcus aureus* biofilm formation. PLoS One. 2010; 5(4): e10146.
- 592 34. Lauderdale KJ, Malone CL, Boles BR, Morcuende J, Horswill AR. Biofilm dispersal of  
593 community-associated methicillin-resistant *Staphylococcus aureus* on orthopedic implant  
594 material. J Orthop Res. 2010; 28(1): 55-61.
- 595 35. Chen J, Yoong P, Ram G, Torres VJ, Novick RP. Single-copy vectors for integration at the SaPI1  
596 attachment site for *Staphylococcus aureus*. Plasmid. 2014; 76: 1-7.

- 597 36. Maekawa T, Krauss JL, Abe T, Jotwani R, Triantafilou M, Triantafilou K, et al. *Porphyromonas*  
598 *gingivalis* manipulates complement and TLR signaling to uncouple bacterial clearance from  
599 inflammation and promote dysbiosis. *Cell Host Microbe*. 2014; 15(6): 768-778.
- 600 37. Schindelin J, Arganda-Carreras I, Frise E, Kaynig V, Longair M, Pietzsch T, et al. Fiji: an open-  
601 source platform for biological-image analysis. *Nat Methods*. 2012; 9(7): 676-682.
- 602 38. Morita S, Kojima T, Kitamura T. Plat-E: an efficient and stable system for transient packaging of  
603 retroviruses. *Gene Ther*. 2000; 7(12): 1063-1066.

## 604 Figure Legends

605 **Fig 1. *S. aureus* resides within OCs *in vivo* and *in vitro*.** (A) Confocal microscopy of histological  
606 sections reveals internalized GFP+ *S. aureus* inside TRAP<sup>Red</sup> OCs within mouse calvarium (yellow)  
607 and (B) within OCs differentiated from BMMs with three days of RANKL and M-CSF on glass  
608 coverslips (green puncta). (C) TRAP staining of BMMs differentiated towards OCs for up to three  
609 days showing multiple TRAP+ mononuclear cells at D2 and numerous TRAP+ multinuclear fully  
610 differentiated OCs at D3. (D) Enumerated colony forming units (CFUs) grown on tryptic soy agar from  
611 lysates of BMMs differentiated towards OCs for up to three days and infected with *S. aureus* for 18  
612 hours, with gentamicin killing of extracellular bacteria. \*\*\*\*p<0.0001 by one-way ANOVA with Tukey's  
613 post-hoc test, compared to D0. n=3 technical replicates, representative > 5 biological replicates.  
614

615 **Fig 2. *S. aureus* proliferates within OCs *in vitro*.** BMMs were treated with RANKL for up to three  
616 days and subjected to the gentamicin protection assay. (A) Colony forming units (CFU) from lysates  
617 of infected cells after OC differentiation for 0, 2, or 3 days. Cells were lysed immediately after  
618 gentamycin exposure (1.5 hpi) or after an additional 16.5 hour in osteoclastogenic (D2, D3) or control  
619 media (D0). n=3 technical replicates, representative > 5 biological replicates. (B) CFU from lysates of  
620 infected human CD14+ monocytes isolated from peripheral blood and differentiated into OCs for 3  
621 days before infection. n=3 biological replicates. (C) CFU from lysates of infected BMMs after  
622 exposure for 2 days to either PBS, RANKL, IFN- $\gamma$  or IL-4. n=3 technical replicates, representative of  
623 3 biological replicates. (D) Offset histogram of flow cytometric data from infected cells differentiated in  
624 RANKL for 0 or 2 days, then infected with GFP+ *S. aureus* at an MOI of 1:1. Infected cells were  
625 detected by an increased signal in the FITC channel. The threshold for FITC+ is depicted by the  
626 dashed line, based on cells infected with GFP- bacteria. n=3 biological replicates. (E) Infected cells  
627 (GFP+) are shown as a percentage of total cells, as measured via flow cytometry. (F) Mean  
628 fluorescence intensity (MFI) as measured from the FITC+ fraction of cells via flow cytometry. (G)  
629 Transmission electron micrograph of dividing *S. aureus* in a membrane-bound compartment inside an  
630 OC. \*\*p<0.01, \*\*\*\*p<0.0001 by two-way ANOVA with Tukey's post-hoc test (A, C, F) or student's t-  
631 test (B).  
632

633 **Fig 3. Intracellular growth of *S. aureus* is NFATc1-dependent in response to RANKL.** (A) BMMs  
634 harvested from NFATc1 conditional knockout animals (cKO) show no basal (D0) or induced (D2)  
635 NFATc1 protein by western blot as compared to littermate control mice BMMs (Ctrl). (B) TRAP  
636 staining after 3 days of RANKL exposure demonstrates failure of NFATc1-cKO BMMs to form TRAP+



637 multinuclear OCs. (C) CFU from lysates of Ctrl or NFATc1 cKO BMMs differentiated into OCs for 0 or  
638 2 days and subjected to the gentamicin protection assay. All bars represent 18 hours post infection  
639 (hpi). White bars, Ctrl; black bars, NFATc1 cKO cells. (D) CFU from lysates of wild-type (WT) BMMs  
640 transfected with empty vector (pMX-EV, white bars) or NFATc1 overexpressing vector (pMX-NFAT,  
641 black bars) at 18hpi, showing positive effect of NFATc1 at D2. (E) Rosiglitazone treatment of WT  
642 BMMs increases NFATc1 induction more than RANKL alone as measured by western blot of nuclear  
643 extracts. H3, histone 3 antibody. (F) CFU from lysates of WT BMMs treated with Rosiglitazone  
644 (+ROSI, black bars) or untreated (-ROSI, white bars) at 18hpi. n=3 biological replicates. \*\*\*p<0.001,  
645 \*\*\*\*p<0.0001 by two-way ANOVA with Tukey's post-hoc test.  
646

647 **Fig 4. Alternative NF- $\kappa$ B in OCs promotes intracellular *S. aureus* replication *in vitro*.** (A) BMMs  
648 harvested from NIK knockout mice (Nik<sup>-/-</sup>, black bars) and (B) RelB knockout mice (Relb<sup>-/-</sup>, black  
649 bars) were differentiated into OCs for 0, 2, or 3 days and subjected to the gentamicin protection  
650 assay. CFU of intracellular *S. aureus* proliferation were examined at 18 hpi. (C) TRAP stained images  
651 of WT or Relb<sup>-/-</sup> BMMs transduced with empty vector (EV) or NFATc1 overexpressing virus (NFAT)  
652 and differentiated for 48 hours. (D) Western blot of NFATc1 protein expression from WT or Relb<sup>-/-</sup>  
653 (KO) BMMs transduced with EV or NFAT and differentiated with RANKL for 0 (D0) or 2 (D2) days. (E)  
654 WT or Relb<sup>-/-</sup> (KO) cells transduced with EV or NFAT virus, differentiated in RANKL for 3 days and  
655 then infected with *S. aureus* and subjected to the gentamicin protection assay. Bars represent CFU of  
656 lysates at 18hpi. n=3 biological replicates. (A, B) \*\*\*\*p<0.0001 by two-way ANOVA with Tukey's post-  
657 hoc test. (E)\*\*p<0.01, \*\*\*\*p<0.0001 by one-way ANOVA with Tukey's post-hoc test.  
658

659 **Fig 5. *S. aureus* in OCs is not exclusively in lysosomes.** Confocal microscopy images of BMMs  
660 differentiated into OCs and then infected with GFP+ *S. aureus*. (A) Images show GFP+ *S. aureus*  
661 (green), lysosomes (LysoTracker, red), F-actin (turquoise), and nuclei (blue) within OCs. Enumerated  
662 inserts represent higher magnified images (B). (C) The cross-correlation analysis of the peaks of  
663 green (*S. aureus*) and red (lysotracker) fluorescence intensity from the line scans (B1-3, white lines)  
664 is represented with the corresponding Pearson's coefficient (Rr).  
665

## 666 Supporting Information

667 **S1 Fig. Osteoclasts show increased intracellular bacterial load 18 hours after *S. aureus***  
668 **infection by lysostaphin protection assay.** Colony forming units (CFU) from lysates of OCs  
669 differentiated for 0, 2, or 3 days (D0, D2, D3, respectively) and subjected to the lysostaphin protection  
670 assay after infection with *S. aureus*. Lysates harvested at 18 hours post-infection. \*\*p=0.0014,  
671 \*\*\*\*p<0.0001 by one-way ANOVA with Tukey's post-hoc analysis. n=3 biological replicates.  
672

673 **S2 Fig. OCs grown on bone chips *in vitro* allow *S. aureus* replication similar to OCs grown on**  
674 **plastic.** Colony forming units (CFU) from lysates of OCs grown on bone chips for 5 days and  
675 subjected to the gentamicin protection assay after infection with *S. aureus*, harvested at 1.5 or 18  
676 hours post infection (hpi). \*\*p<0.01 by t-test. n=3 biological replicates.  
677

678 **S1 Table. Increased *S. aureus* colony formation is not the result of an increased extracellular**  
679 **bacterial load.** Colony forming units (CFU) from sampled media during the course of the gentamicin  
680 protection assay. Samples taken from the media of cells differentiated into OCs for 0 (D0) or 2 (D2)

681 days at 12, 15, or 18 hours post infection (hpi). Colonies listed as total number of colonies formed (#)  
682 and the CFU (log) after 1000-fold dilution.  
683

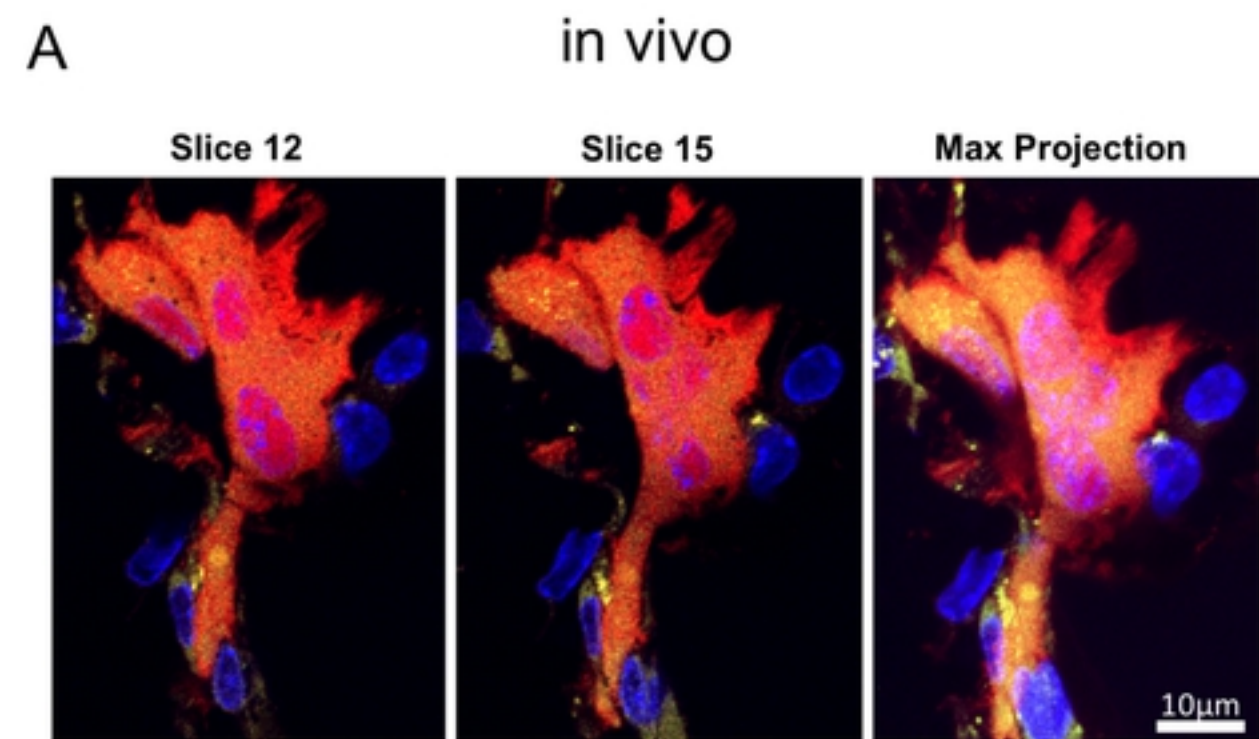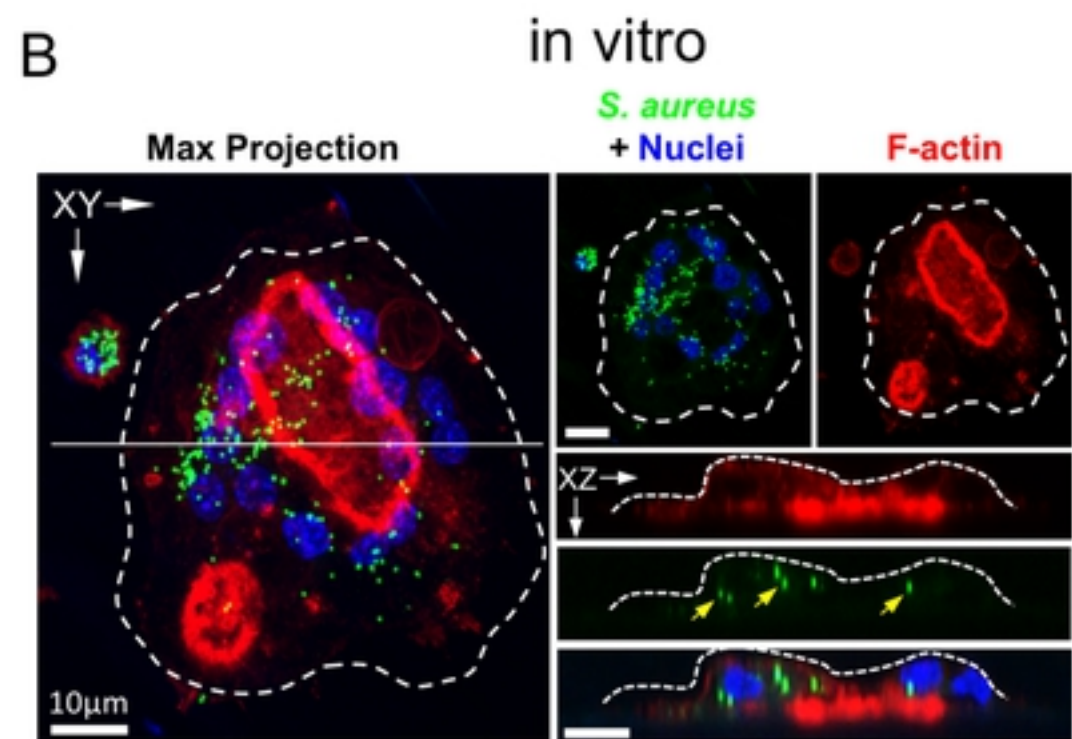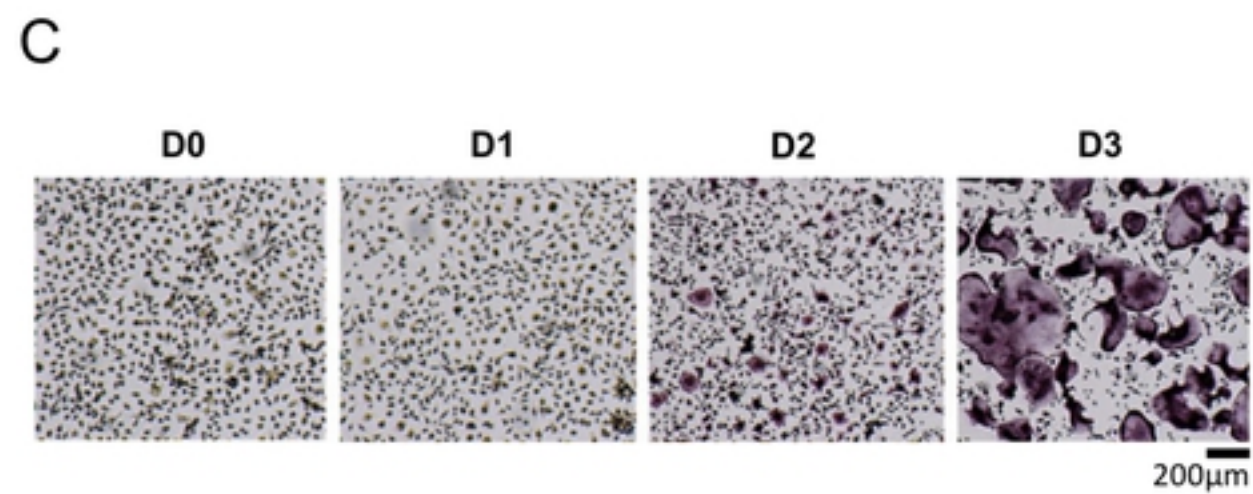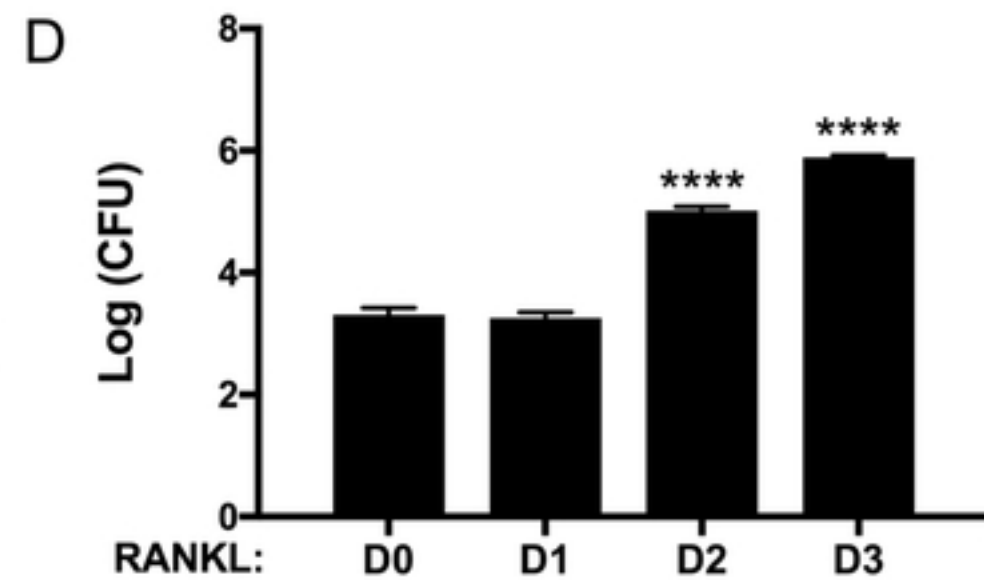

Figure 1

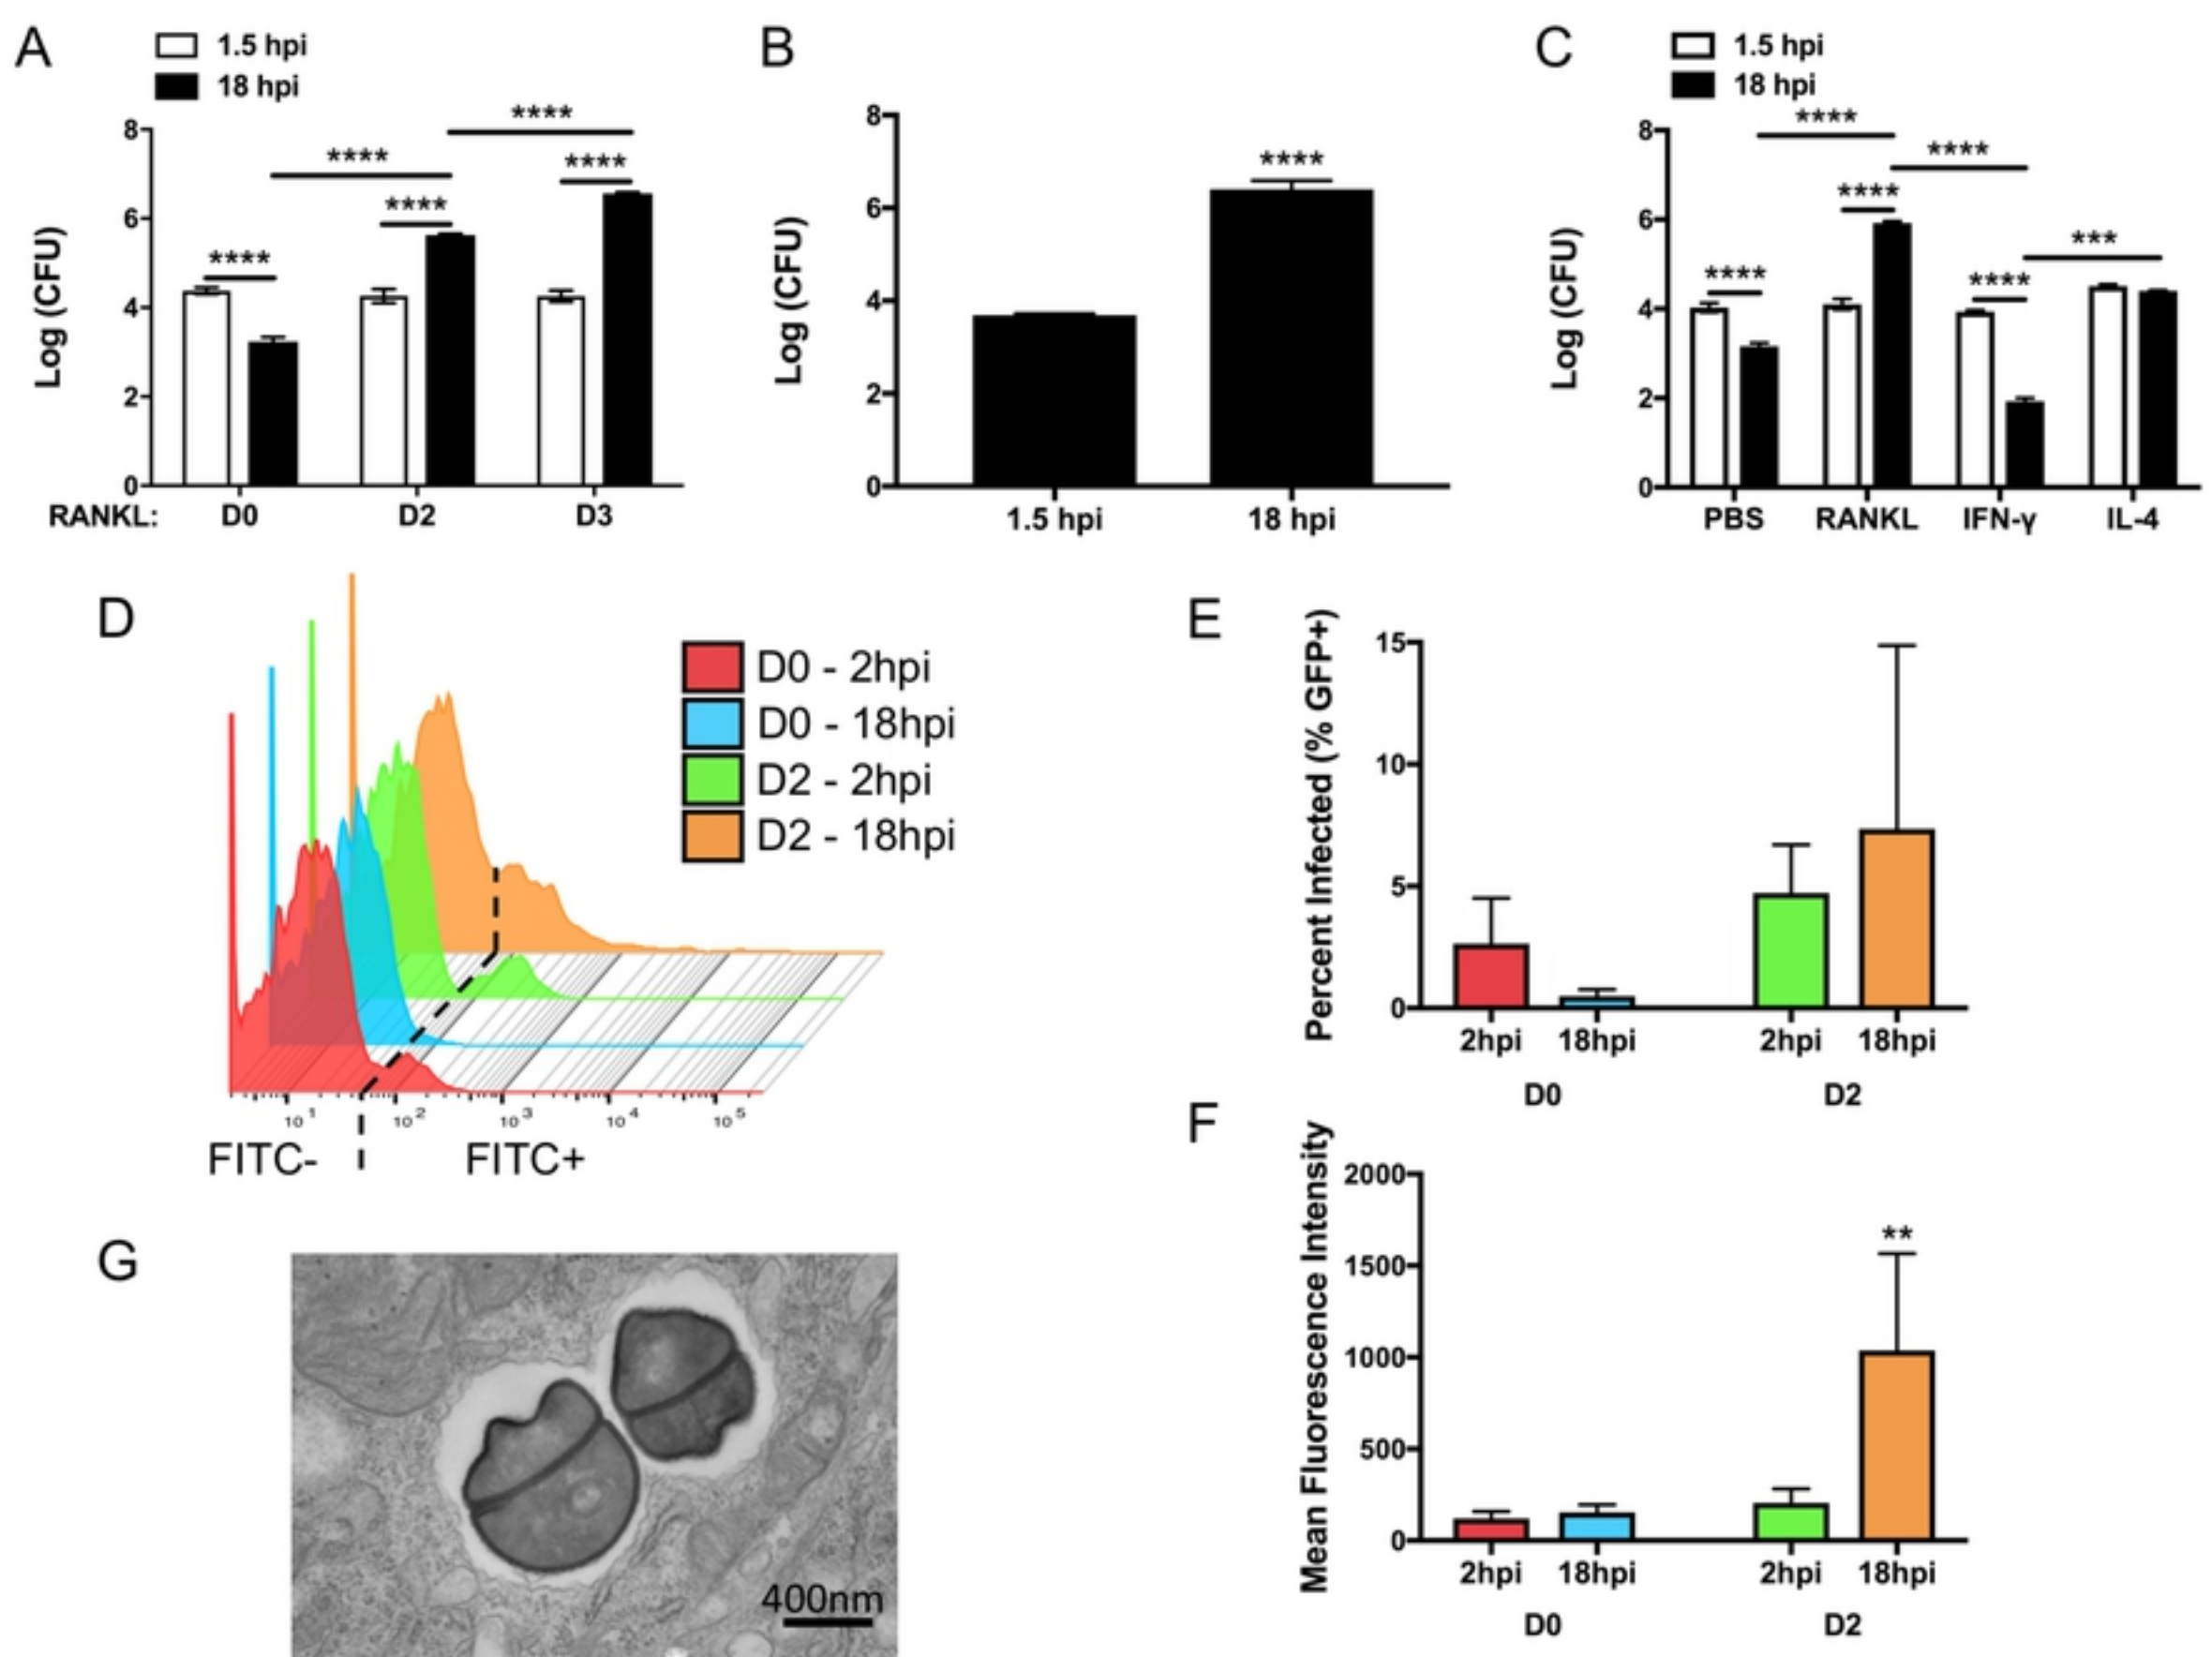

Figure 2



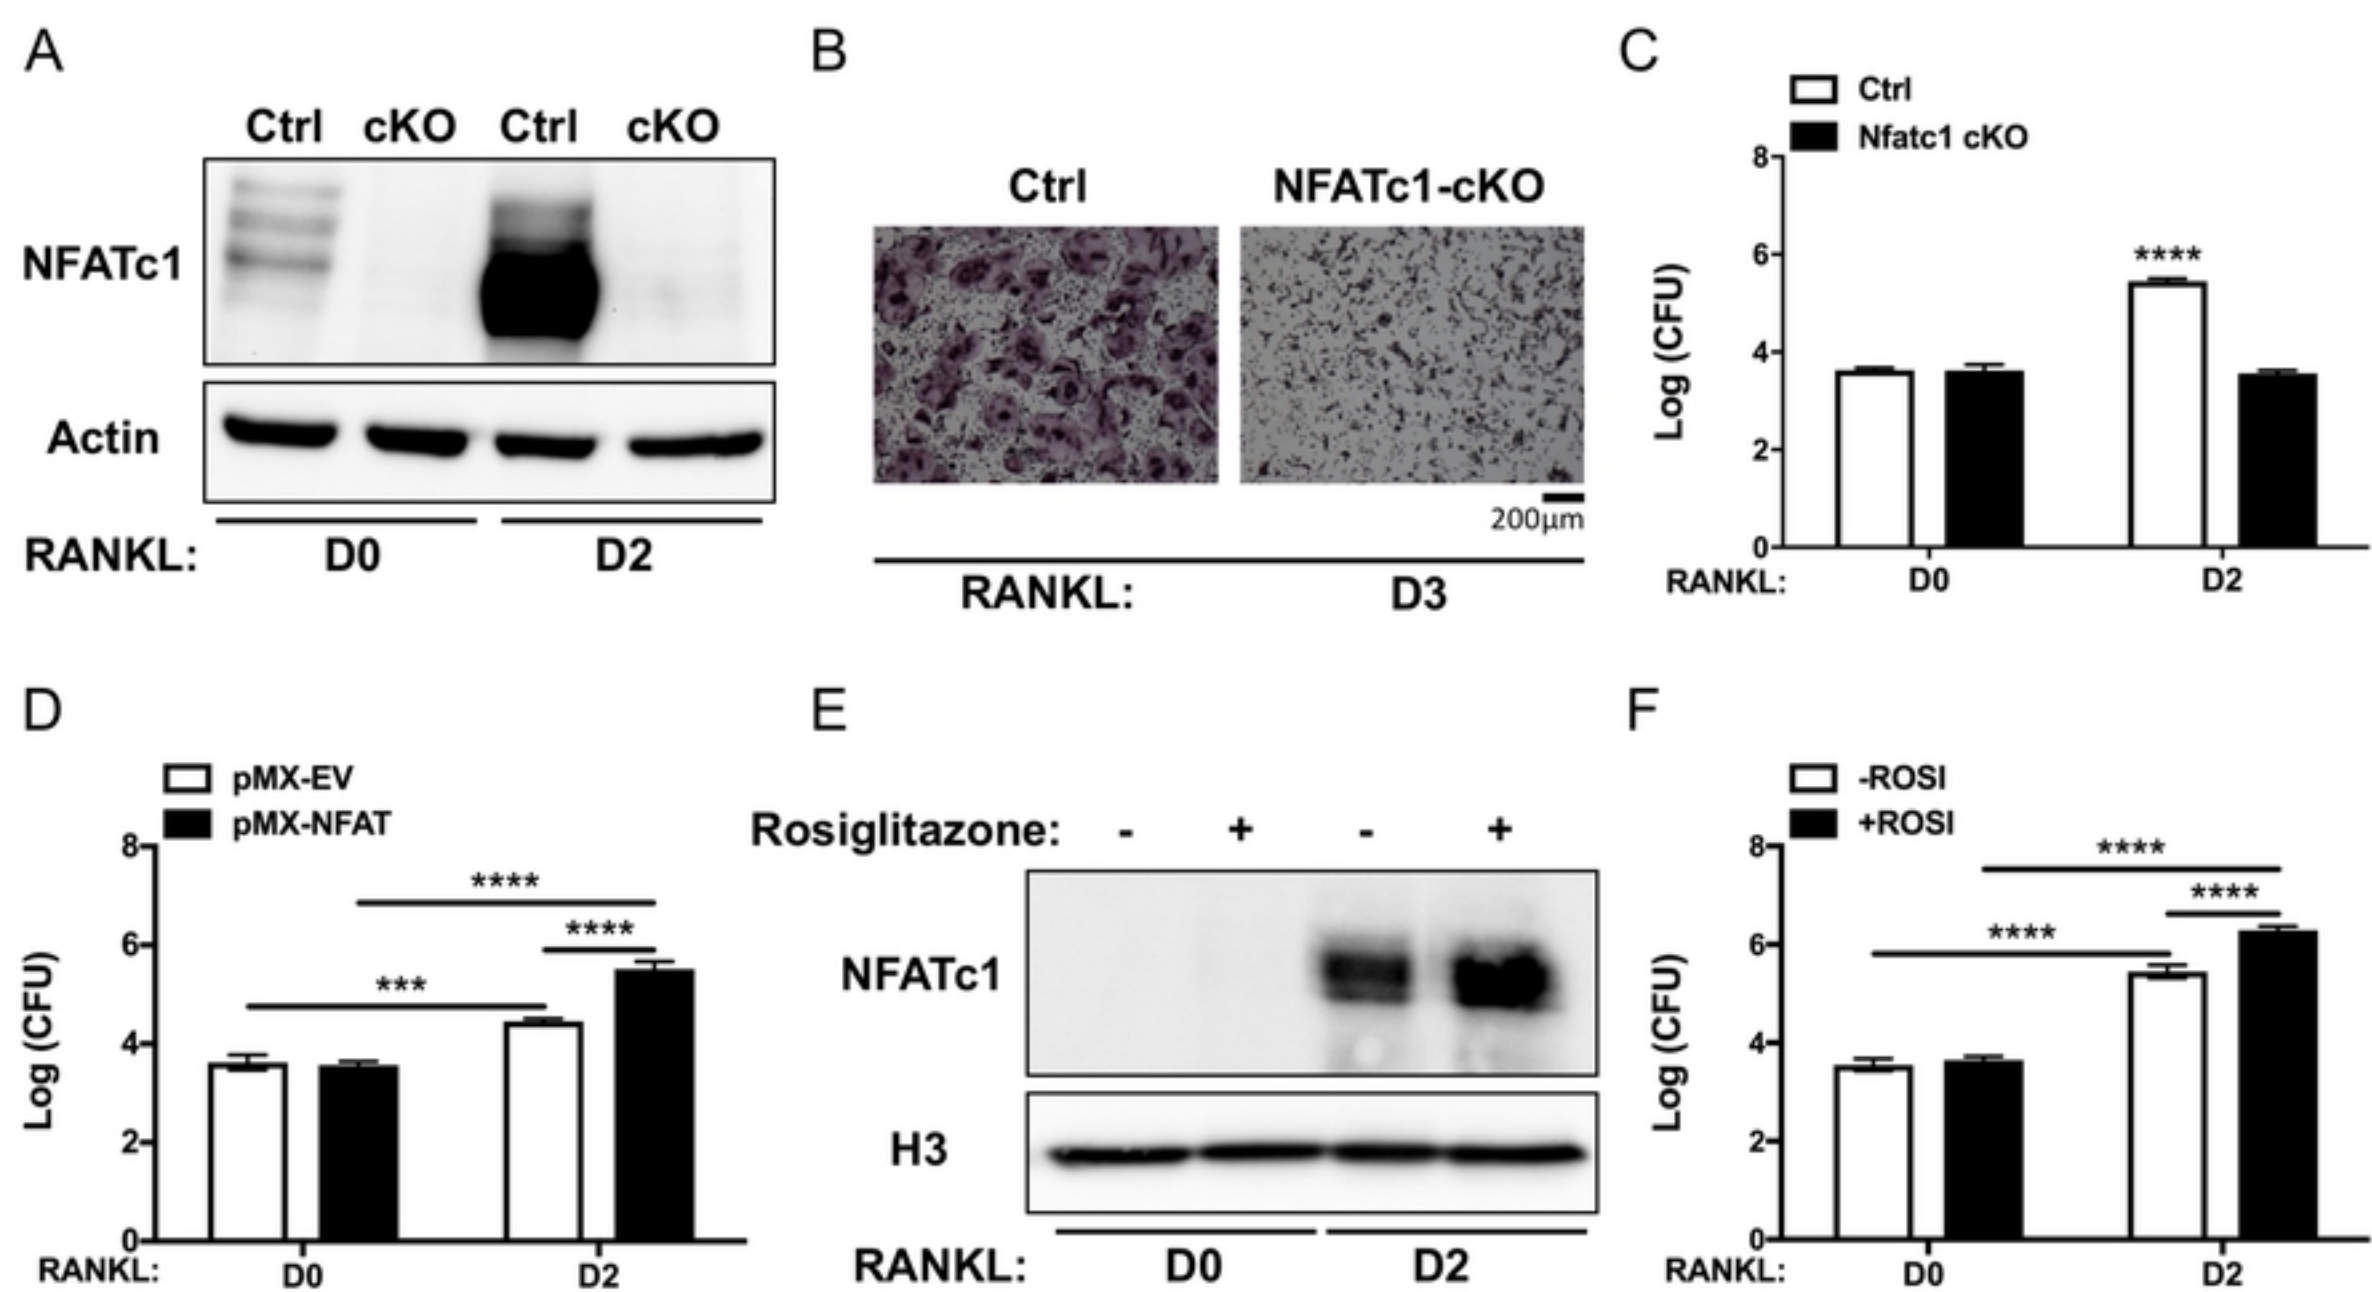

Figure 3

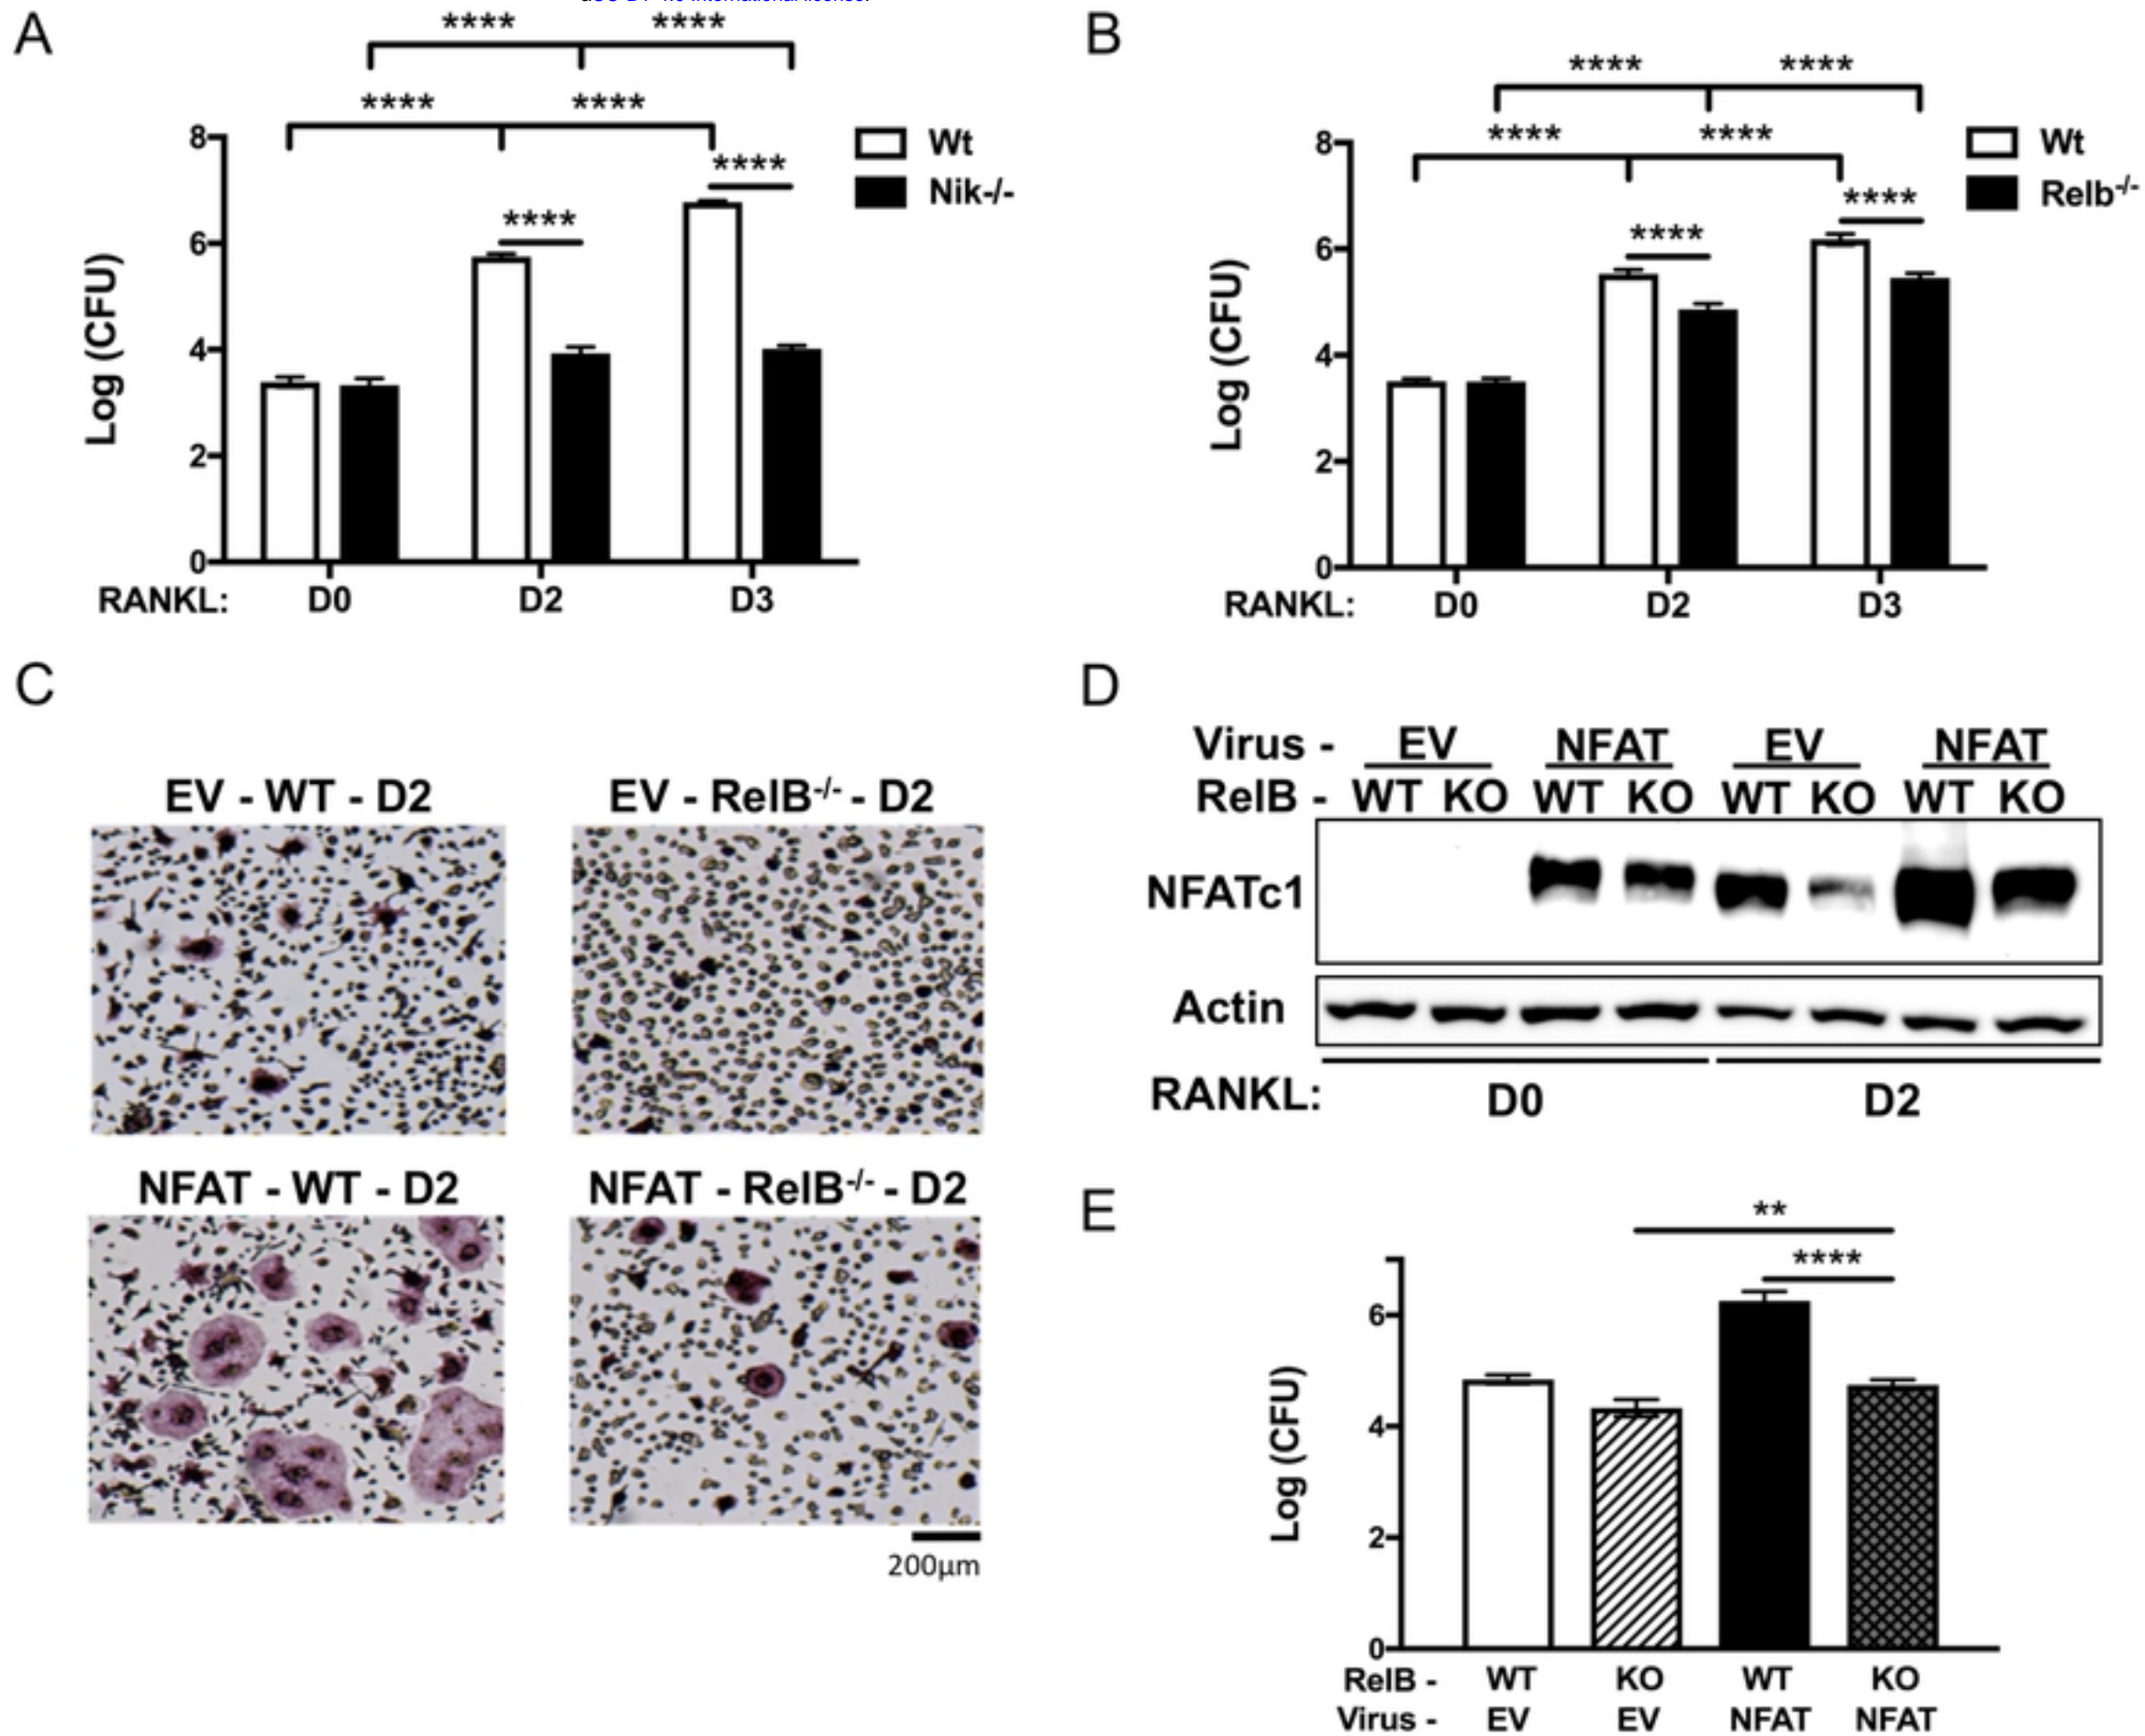

Figure 4



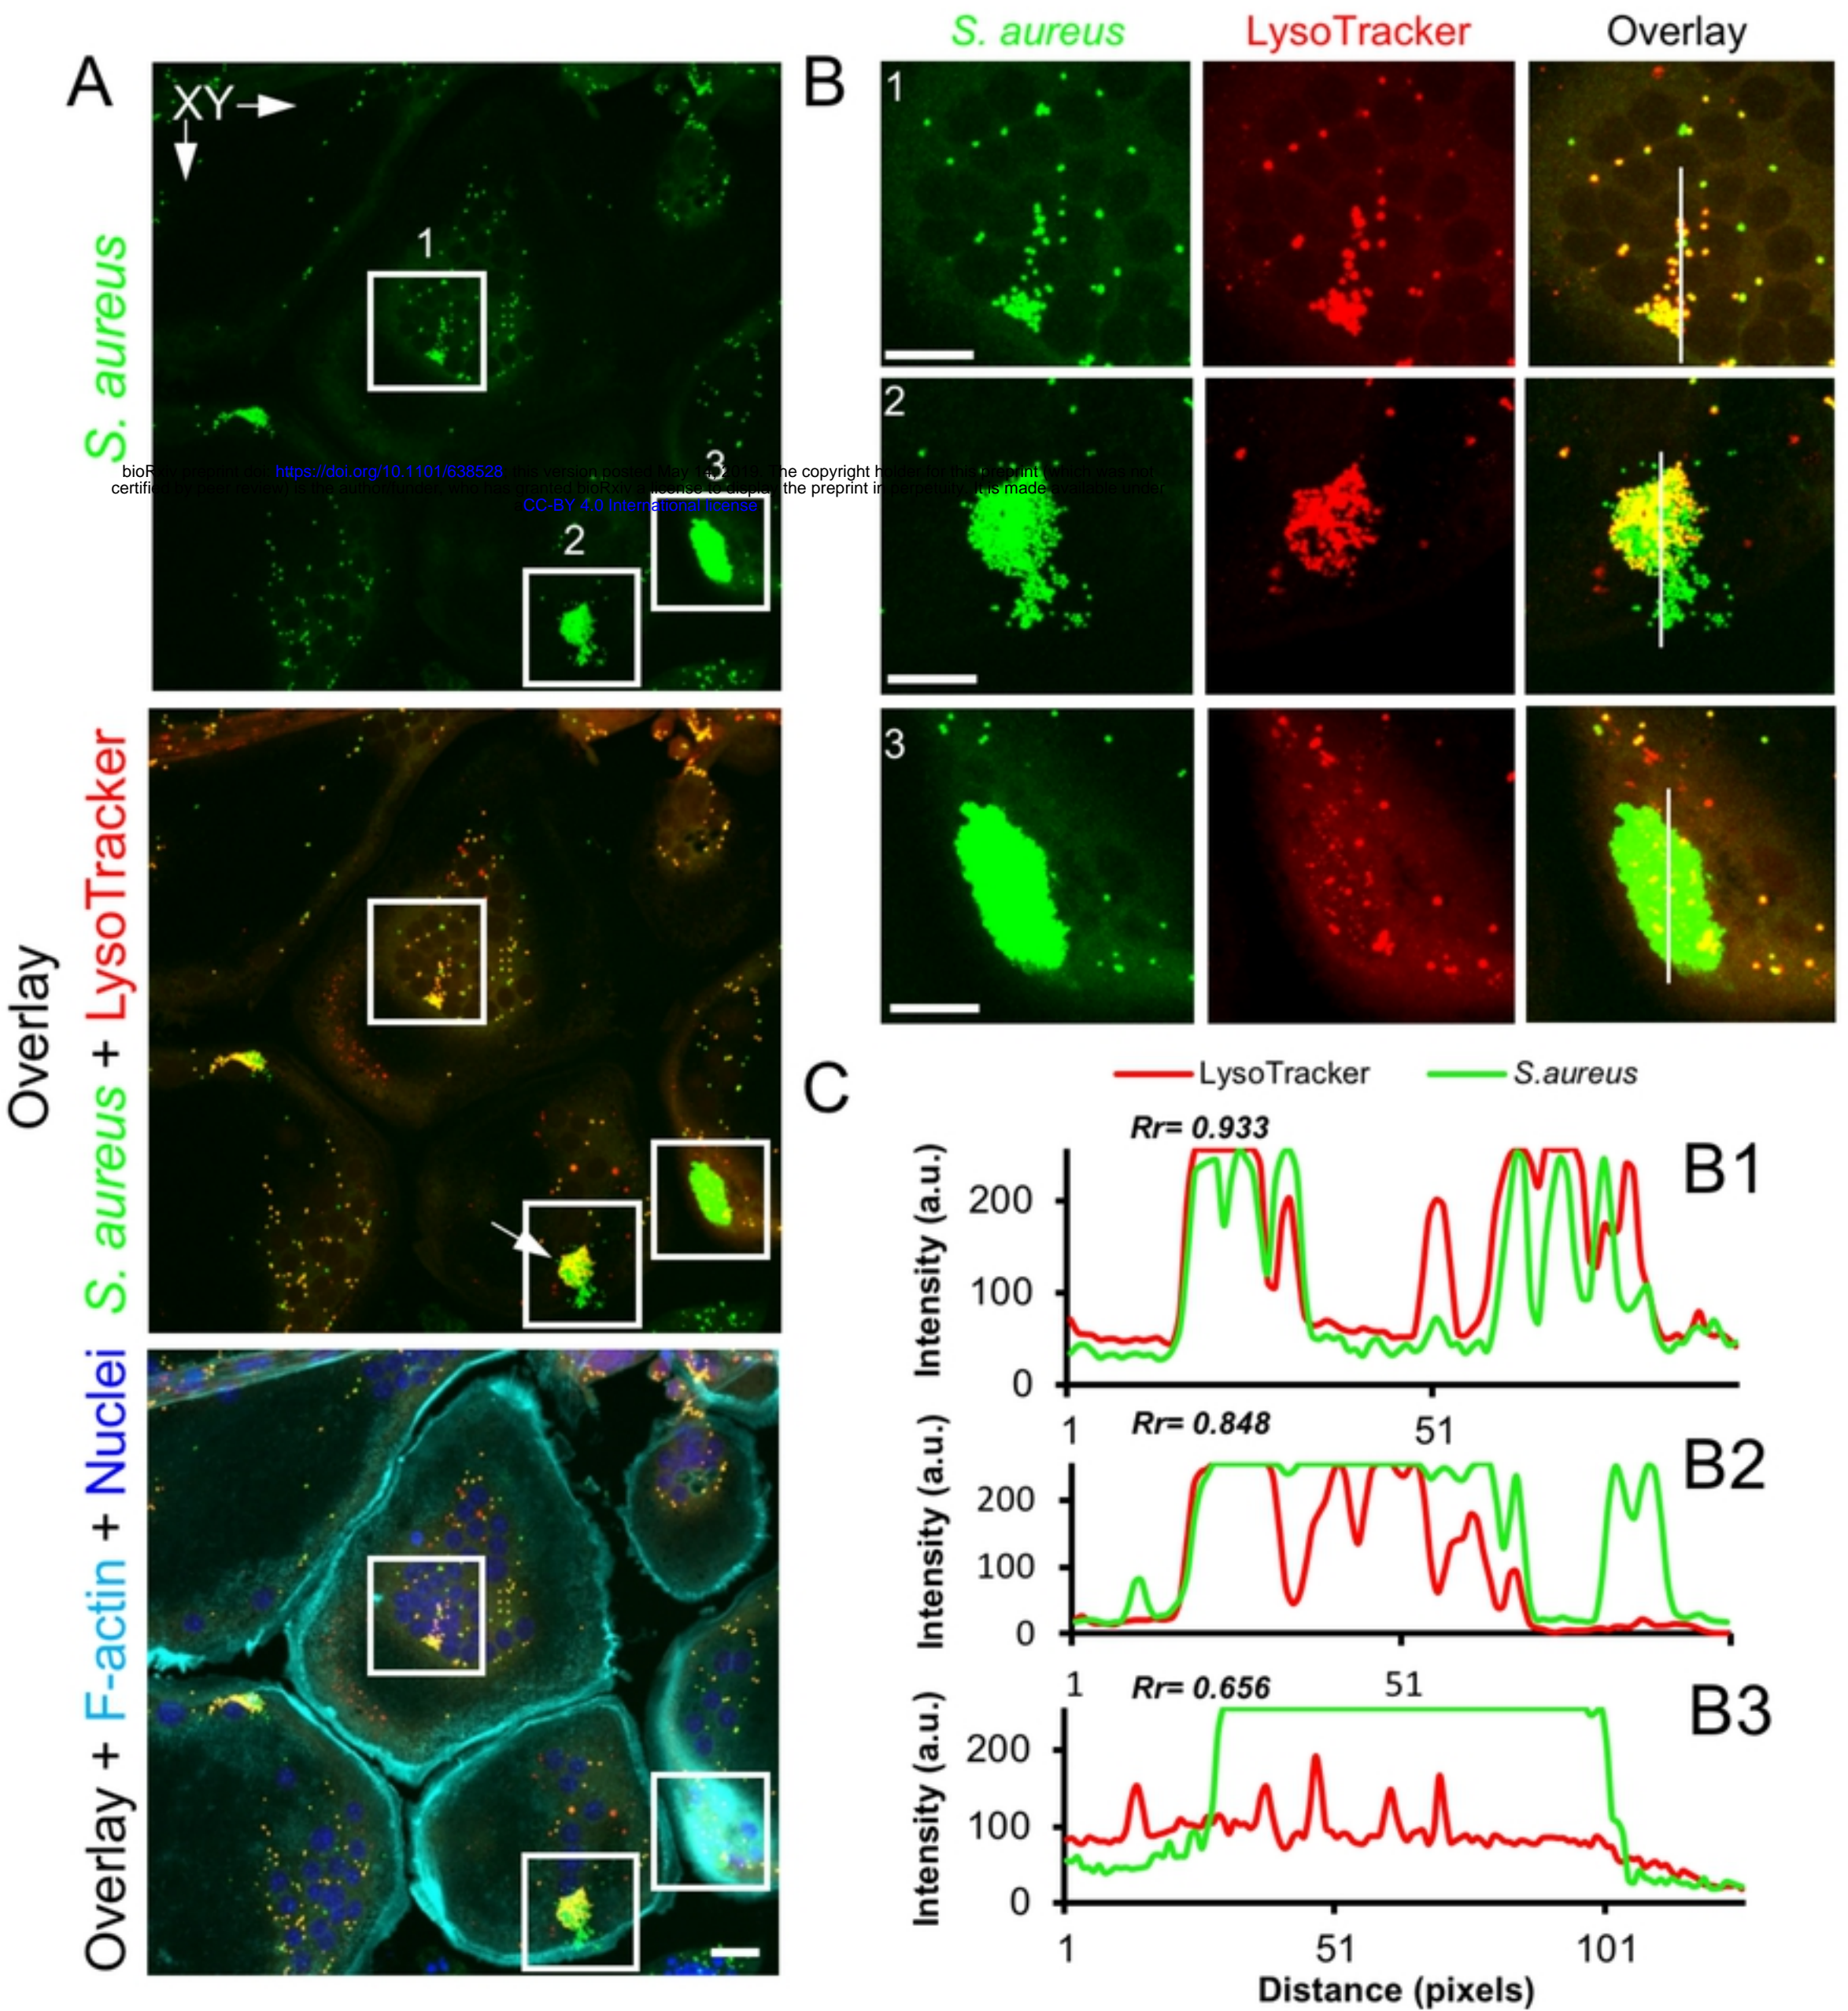

Figure 5
